# Supplementary material for: A dataset of ground-based vertical profile observations of aerosol, NO 2 and HCHO from the hyperspectral vertical remote sensing network in China (2019–2023)
Source: Copernicus journal article supplement (doi:10.5194/essd-2024-562), 2024-12-18
Supplement: Supplementary file 1 [file essd-2024-562-supplement.pdf]

## Supplement of

# A dataset of ground-based vertical profile observations of aerosol, NO<sub>2</sub> and HCHO from the hyperspectral vertical remote sensing network in China (2019-2023)

5 Peiyuan Jiao<sup>1</sup>, Chengzhi Xing<sup>2\*</sup>, Yikai Li<sup>3</sup>, Xiangguang Ji<sup>4</sup>, Wei Tan<sup>2</sup>, Qihua Li<sup>5</sup>, Haoran Liu<sup>5</sup>, and Cheng Liu<sup>1,2,6,7\*</sup>

<sup>1</sup>Department of Precision Machinery and Precision Instrumentation, University of Science and Technology of China, Hefei 230026, China

10 <sup>2</sup>Key Laboratory of Environmental Optics and Technology, Anhui Institute of Optics and Fine Mechanics, Hefei Institutes of Physical Science, Chinese Academy of Sciences, Hefei, 230031, China

<sup>3</sup>School of Environmental Science and Optoelectronic Technology, University of Science and Technology of China, Hefei 230026, China

<sup>4</sup>Information Materials and Intelligent Sensing Laboratory of Anhui Province, Anhui University, Hefei, Anhui, 230601, China

<sup>5</sup>Institute of Physical Science and Information Technology, Anhui University, Hefei 230601, China

15 <sup>6</sup>Center for Excellence in Regional Atmospheric Environment, Institute of Urban Environment, Chinese Academy of Sciences, Xiamen 361021, China

<sup>7</sup>Key Laboratory of Precision Scientific Instrumentation of Anhui Higher Education Institutes, University of Science and Technology of China, Hefei 230026, China

*Correspondence to:* Chengzhi Xing (xingcz@aiofm.ac.cn); Cheng Liu (chliu81@ustc.edu.cn)

20 **Table S1. The Sites location and their corresponding nearest China National Environmental Monitoring Center (CNEMC) stations.**

| No. | MAX-DOAS stations |               |              | The nearest CNEMCs |              | Distance (km) |
|-----|-------------------|---------------|--------------|--------------------|--------------|---------------|
|     | Station(code)     | Longitude(°E) | Latitude(°N) | Longitude(°E)      | Latitude(°N) |               |
| 1   | CAMS              | 116.32        | 39.94        | 116.34             | 39.93        | 2.52          |
| 2   | IAP               | 116.37        | 39.97        | 116.40             | 39.98        | 1.92          |
| 3   | NC                | 116.12        | 39.78        | 116.15             | 39.82        | 4.95          |
| 4   | UCAS              | 116.67        | 40.40        | 116.63             | 40.33        | 9.80          |
| 5   | WD                | 115.15        | 38.17        | 114.85             | 38.03        | 30.38         |
| 6   | XH                | 116.97        | 39.76        | 117.30             | 39.72        | 28.58         |
| 7   | SJZ               | 114.60        | 37.90        | 114.64             | 37.90        | 2.94          |
| 8   | SXU               | 112.58        | 37.63        | 112.56             | 37.74        | 12.09         |
| 9   | IMNU              | 111.68        | 40.80        | 111.66             | 40.80        | 2.52          |
| 10  | DY                | 118.98        | 37.76        | 118.57             | 37.57        | 42.01         |
| 11  | QD                | 120.67        | 36.34        | 120.61             | 36.44        | 11.54         |
| 12  | TS                | 117.10        | 36.25        | 117.09             | 36.20        | 6.11          |
| 13  | TA                | 117.06        | 36.20        | 117.09             | 36.20        | 2.49          |
| 14  | SH_XH             | 121.43        | 31.17        | 121.41             | 31.17        | 2.11          |
| 15  | SH_DL             | 120.97        | 31.09        | 120.98             | 31.09        | 0.02          |
| 16  | NUIST             | 118.71        | 32.20        | 118.81             | 32.11        | 14.16         |
| 17  | NB                | 121.89        | 29.75        | 121.84             | 29.91        | 18.60         |
| 18  | HNI               | 122.67        | 30.86        | 121.80             | 31.05        | 86.33         |

|    |      |        |       |        |       |       |
|----|------|--------|-------|--------|-------|-------|
| 19 | LA   | 119.75 | 30.30 | 119.72 | 32.24 | 7.43  |
| 20 | HNU  | 116.80 | 33.98 | 116.80 | 33.98 | 1.03  |
| 21 | AHU  | 117.18 | 31.77 | 117.20 | 31.78 | 1.80  |
| 22 | CF   | 117.18 | 32.21 | 117.27 | 31.94 | 30.59 |
| 23 | IUE  | 118.05 | 24.61 | 118.10 | 24.57 | 6.03  |
| 24 | GIG  | 113.35 | 23.15 | 113.32 | 23.13 | 4.23  |
| 25 | SUST | 113.99 | 22.59 | 114.03 | 22.62 | 4.22  |
| 26 | SLS  | 99.72  | 28.00 | 99.71  | 27.83 | 19.61 |
| 27 | CQ   | 106.50 | 29.60 | 106.46 | 29.57 | 5.57  |
| 28 | LZU  | 103.85 | 36.04 | 103.83 | 36.05 | 2.10  |
| 29 | XA   | 109.09 | 34.52 | 109.00 | 34.26 | 1.04  |
| 30 | JHI  | 120.77 | 40.47 | 120.83 | 40.71 | 26.25 |
| 31 | LNU  | 123.04 | 41.81 | 123.40 | 41.79 | 1.64  |
| 32 | LY   | 112.45 | 34.67 | 112.44 | 34.67 | 1.58  |

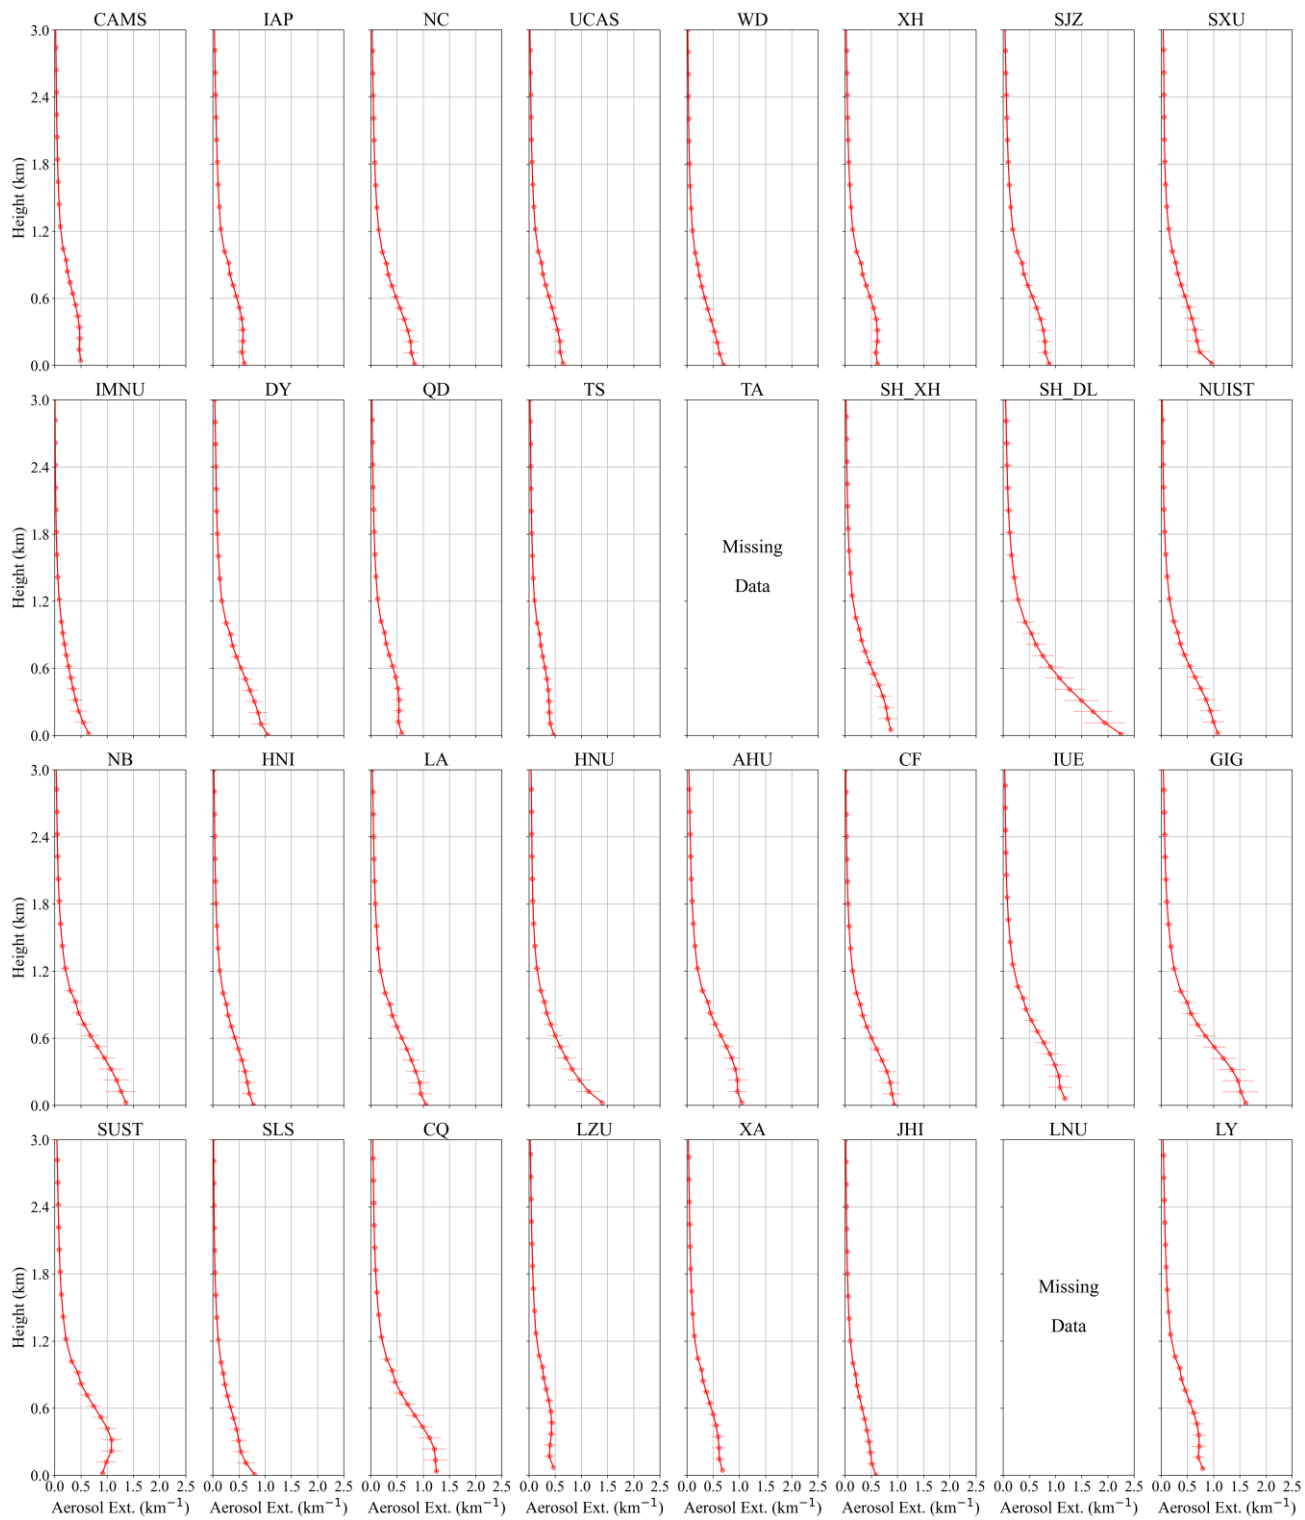

**Figure S1. Spring averaged aerosol extinction vertical profiles during 2019-2023.**

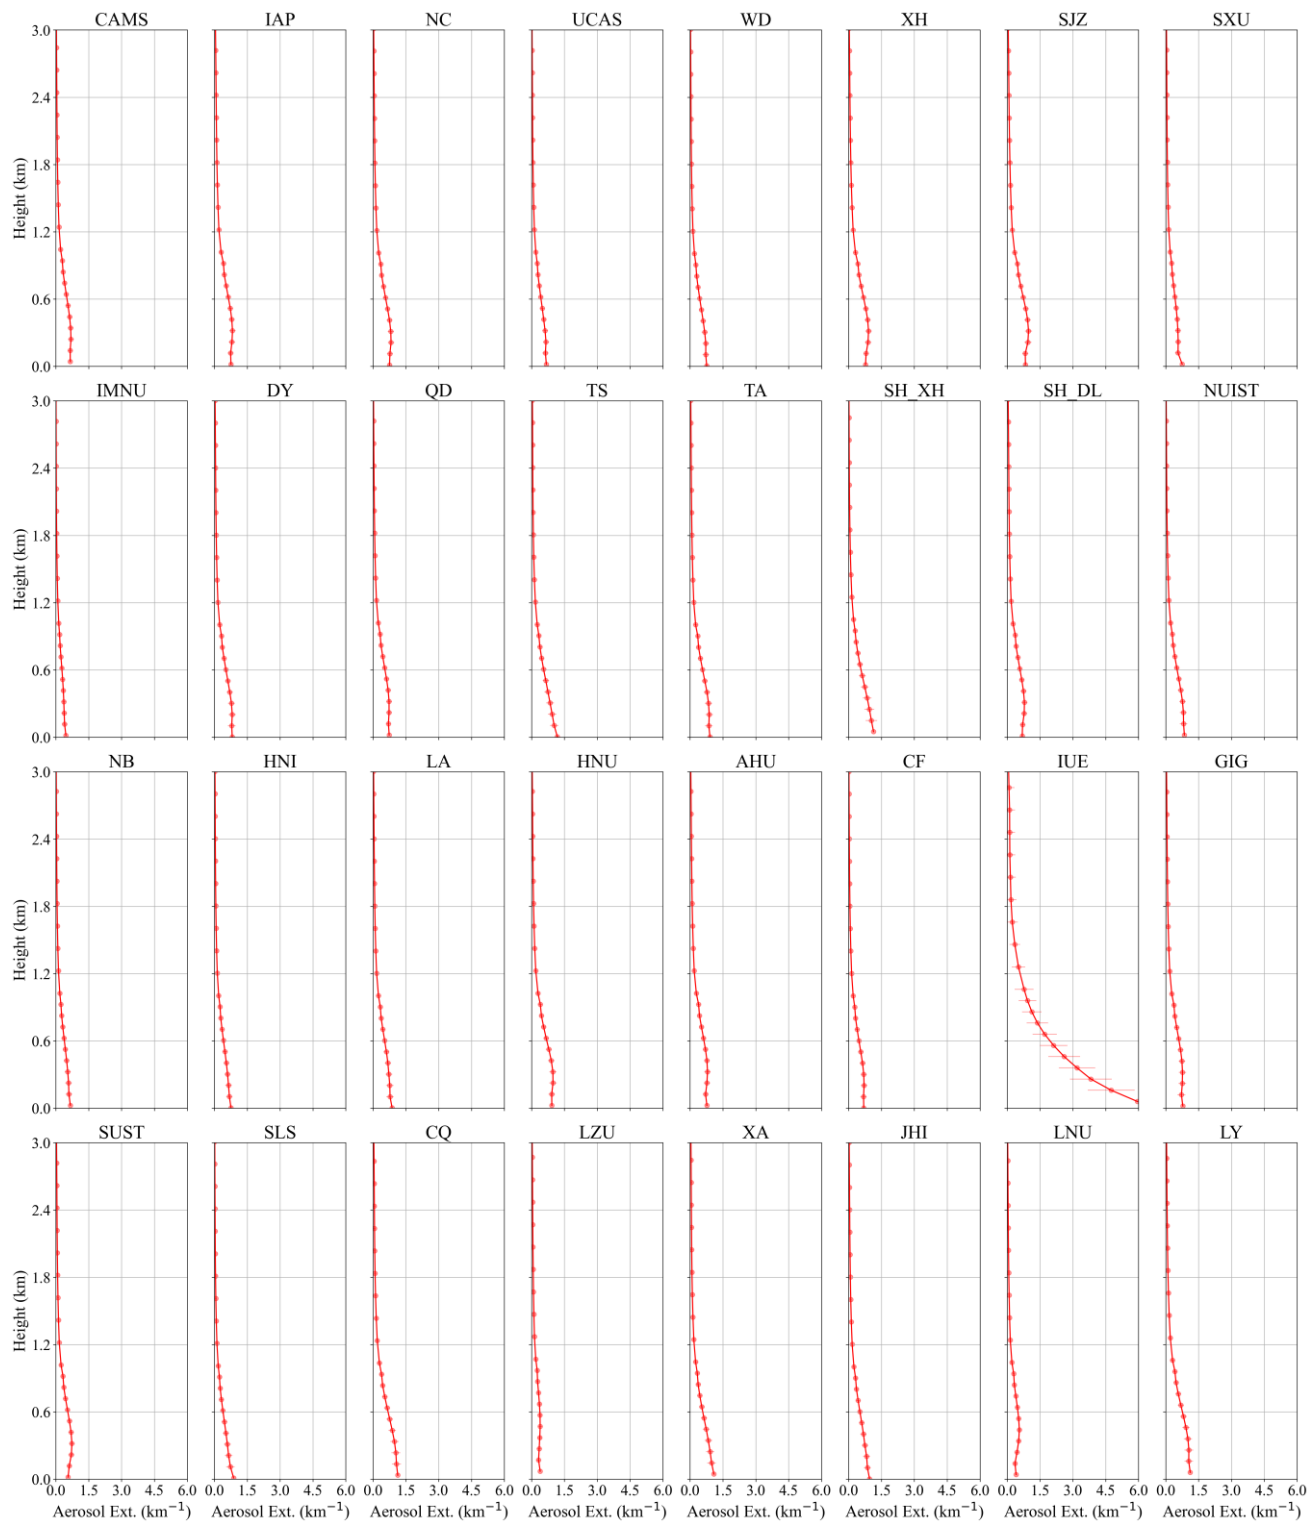

**Figure S2. Summer averaged aerosol extinction vertical profiles during 2019-2023.**

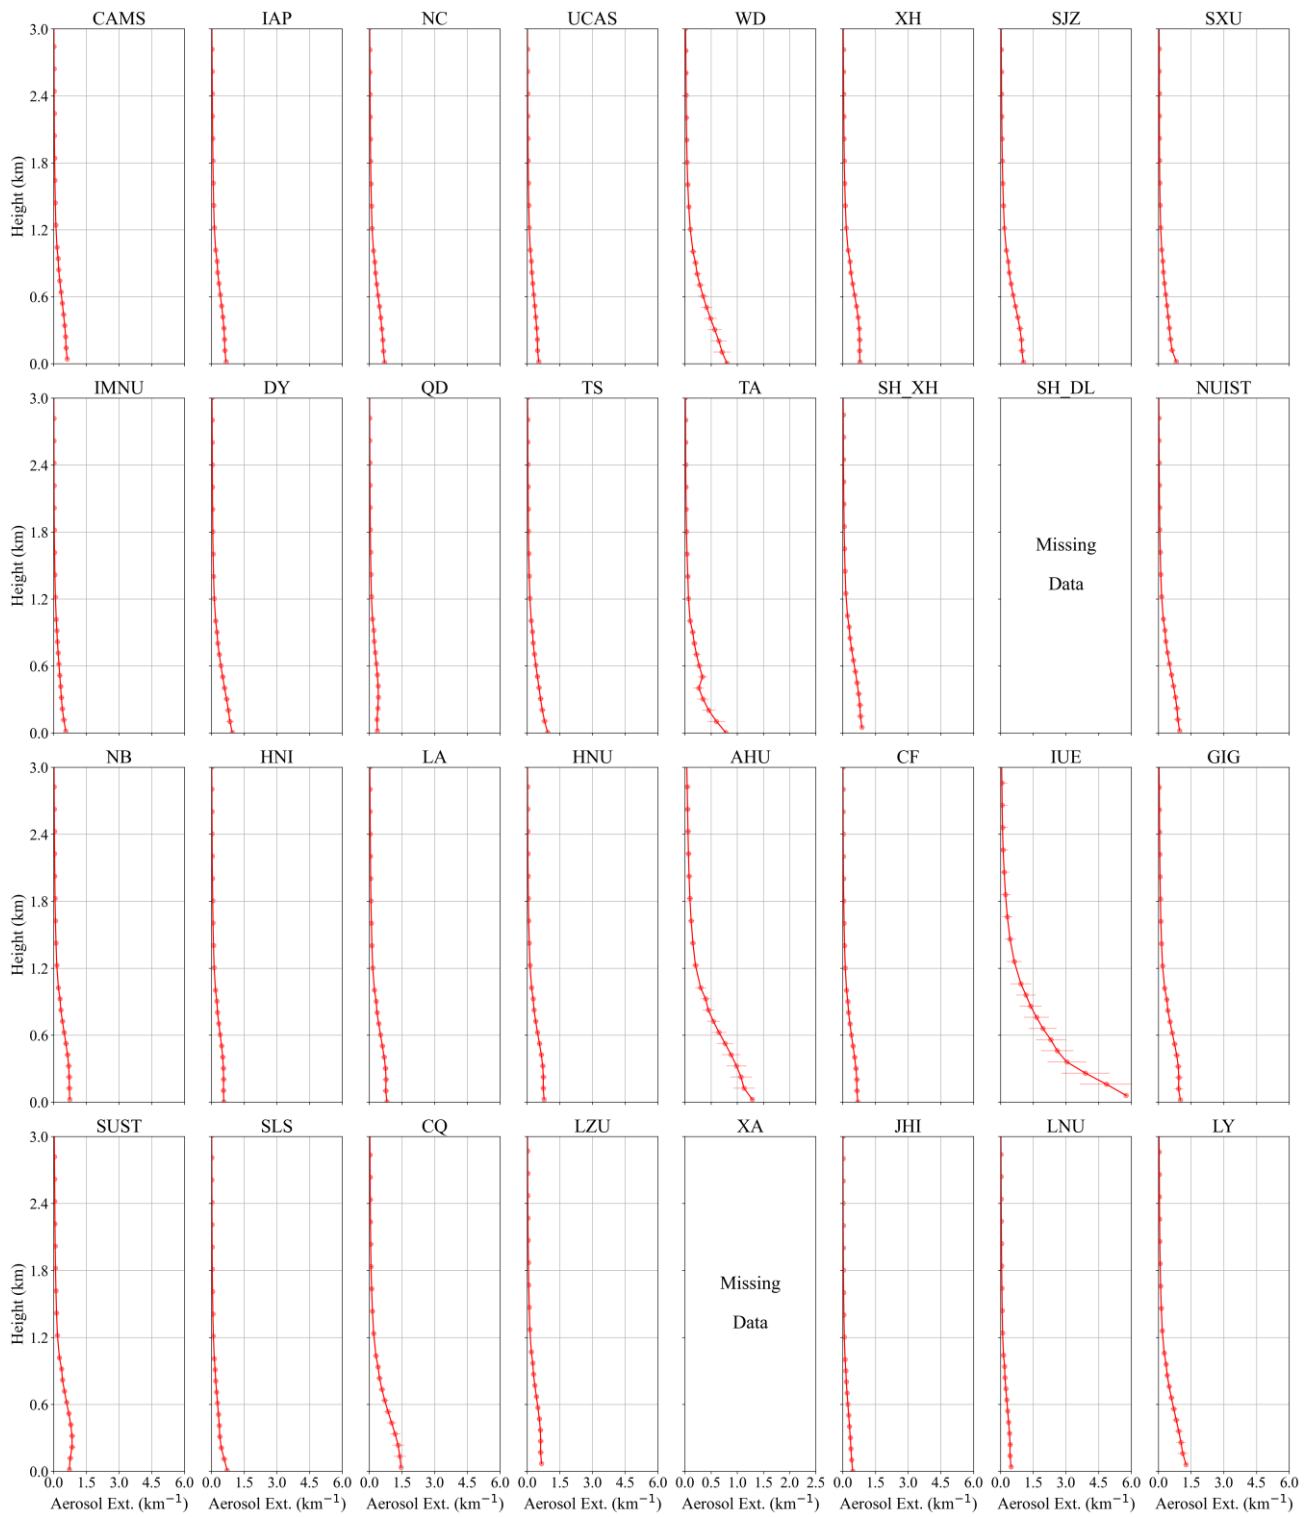

**Figure S3. Autumn averaged aerosol extinction vertical profiles during 2019-2023.**

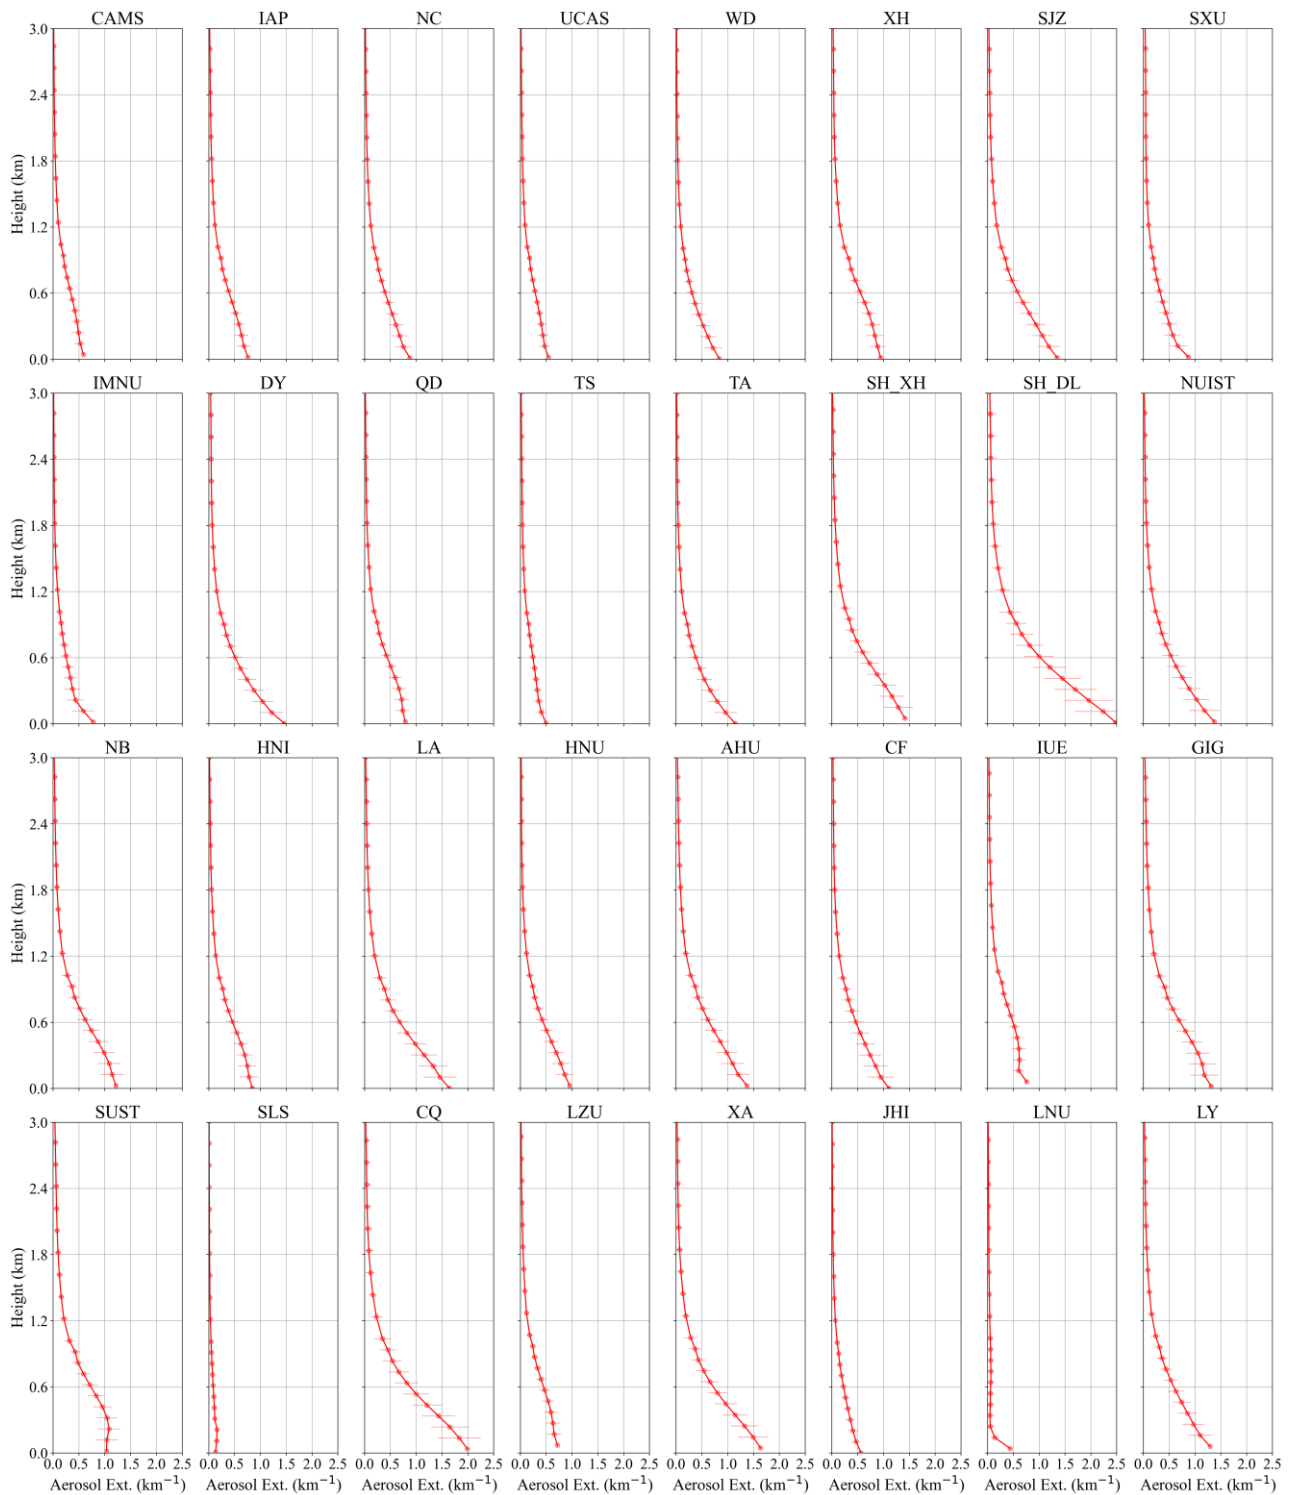

**Figure S4. Winter averaged aerosol extinction vertical profiles during 2019-2023.**

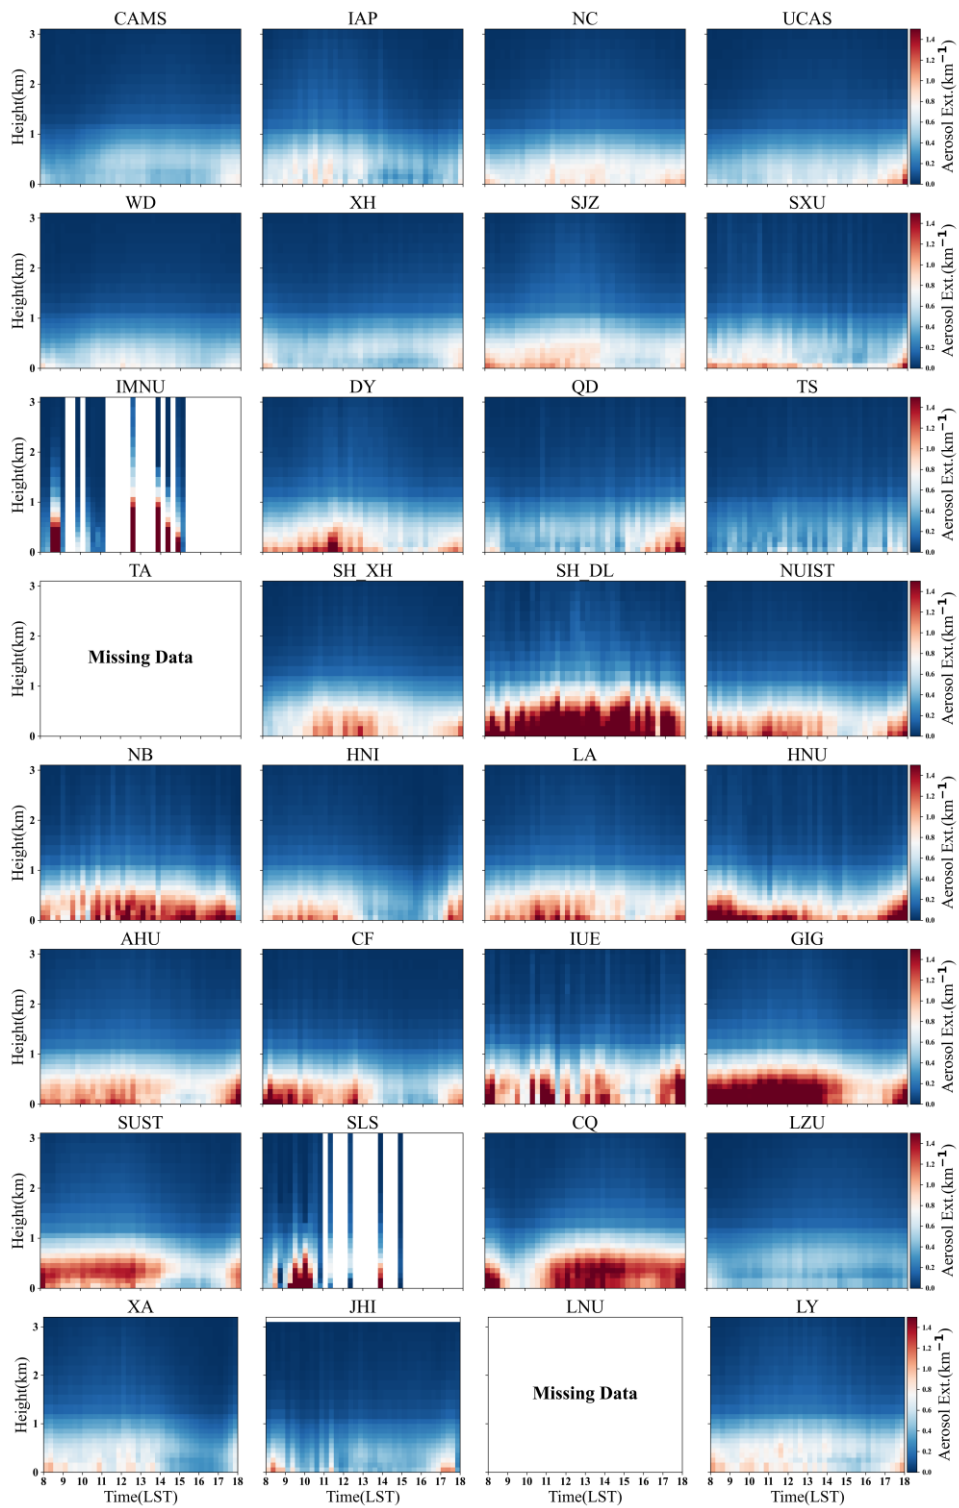

Figure S5. Diurnal variation of the spring averaged aerosol extinction vertical profiles during 2019-2023.

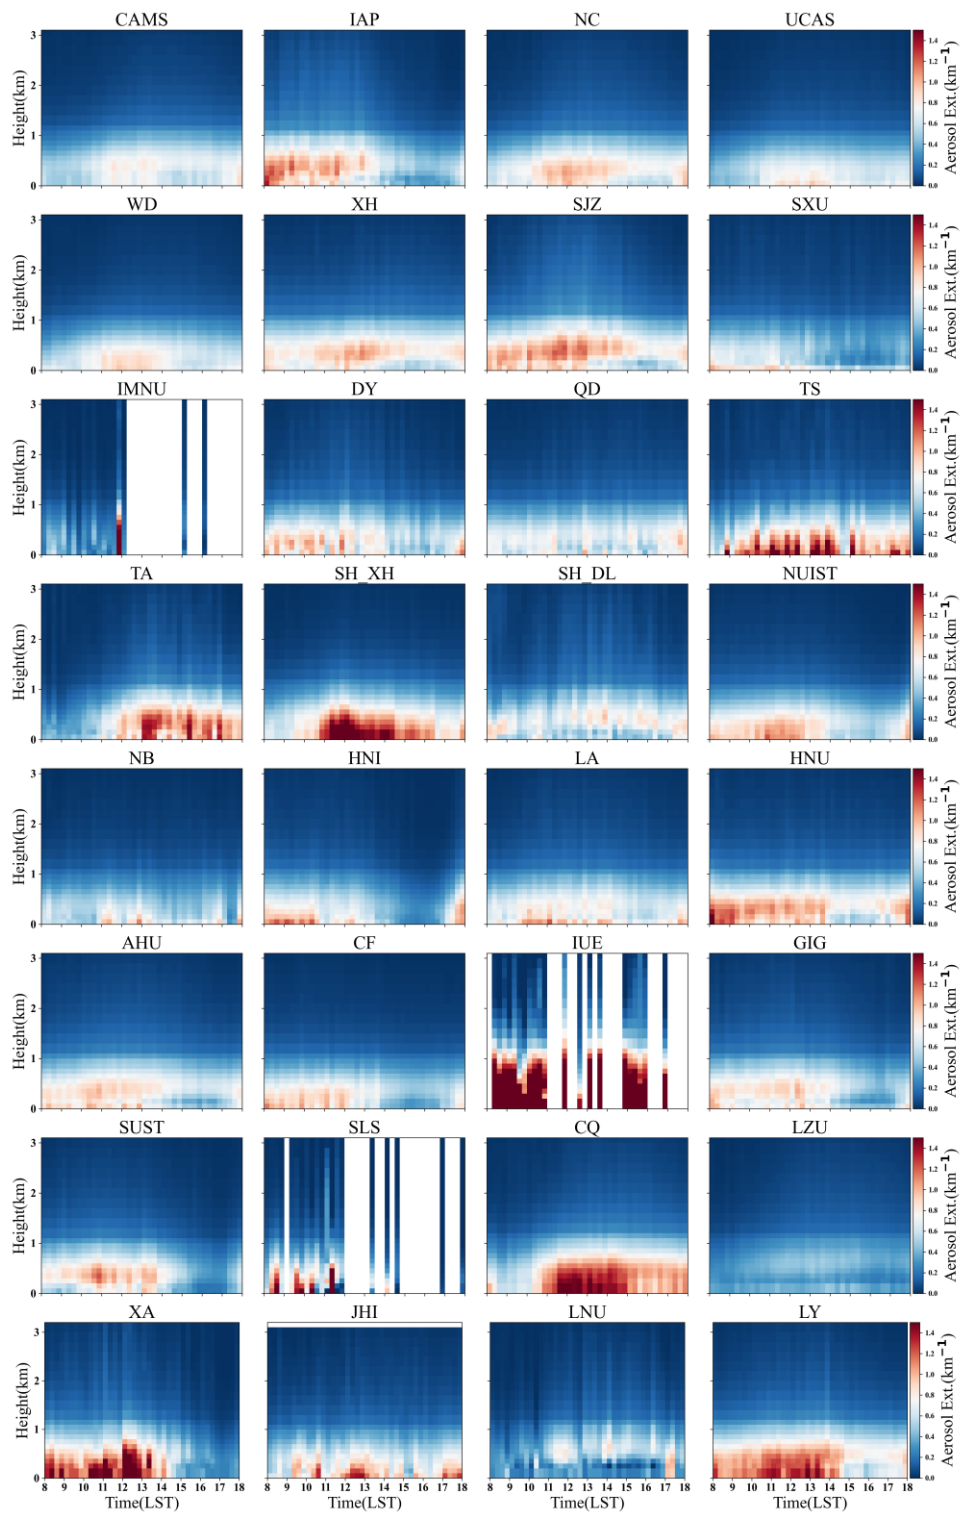

Figure S6. Diurnal variation of the summer averaged aerosol extinction vertical profiles during 2019-2023.



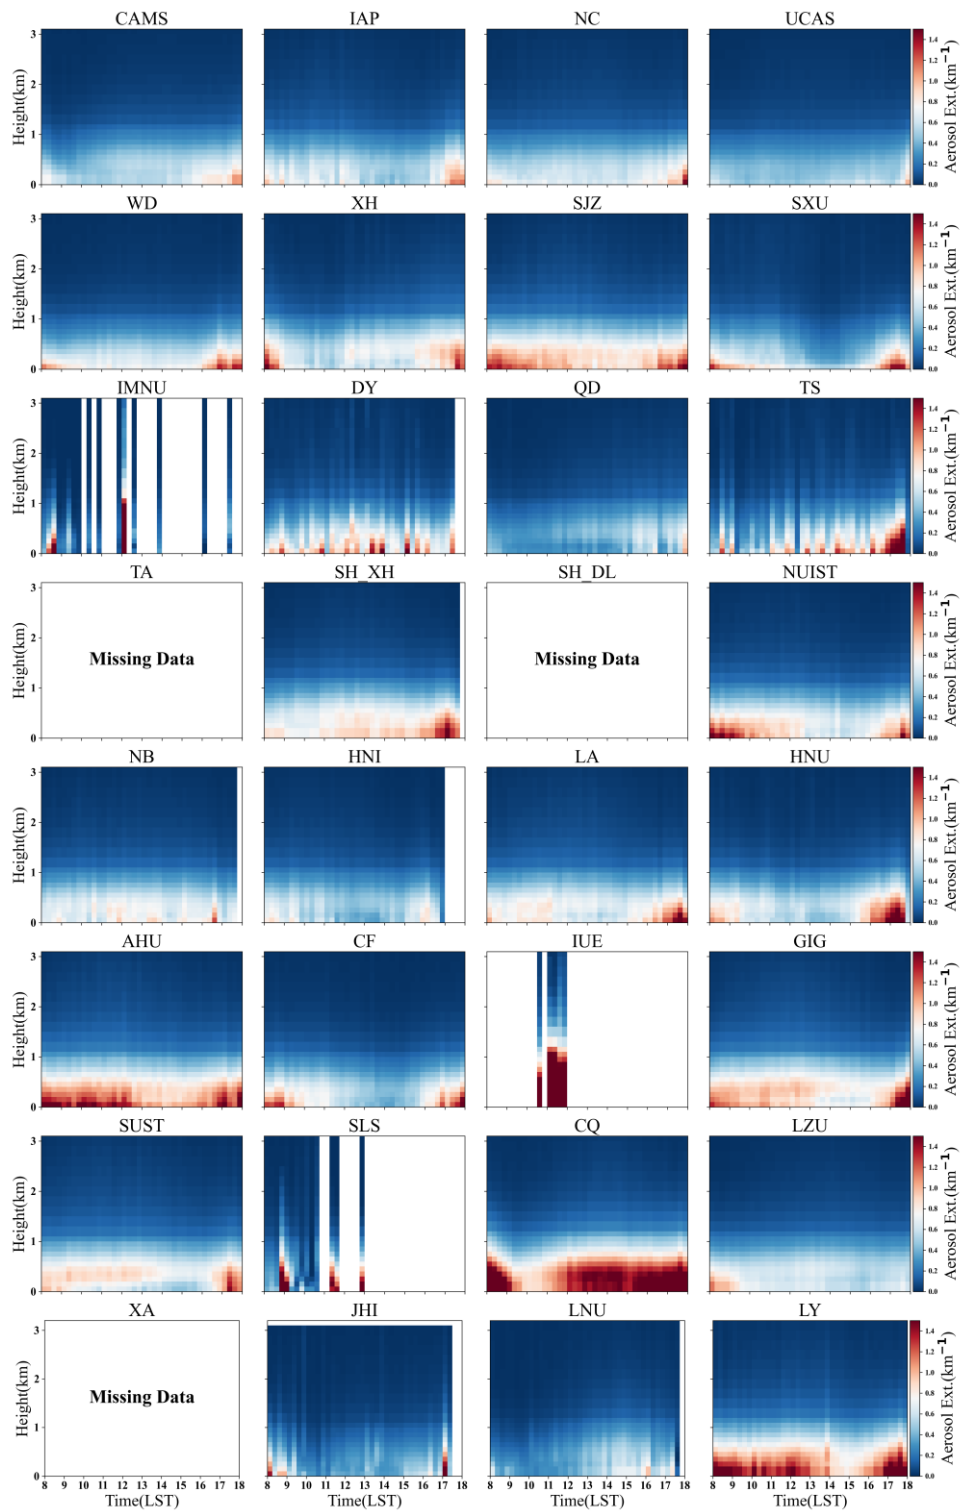

Figure S7. Diurnal variation of the autumn averaged aerosol extinction vertical profiles during 2019-2023.

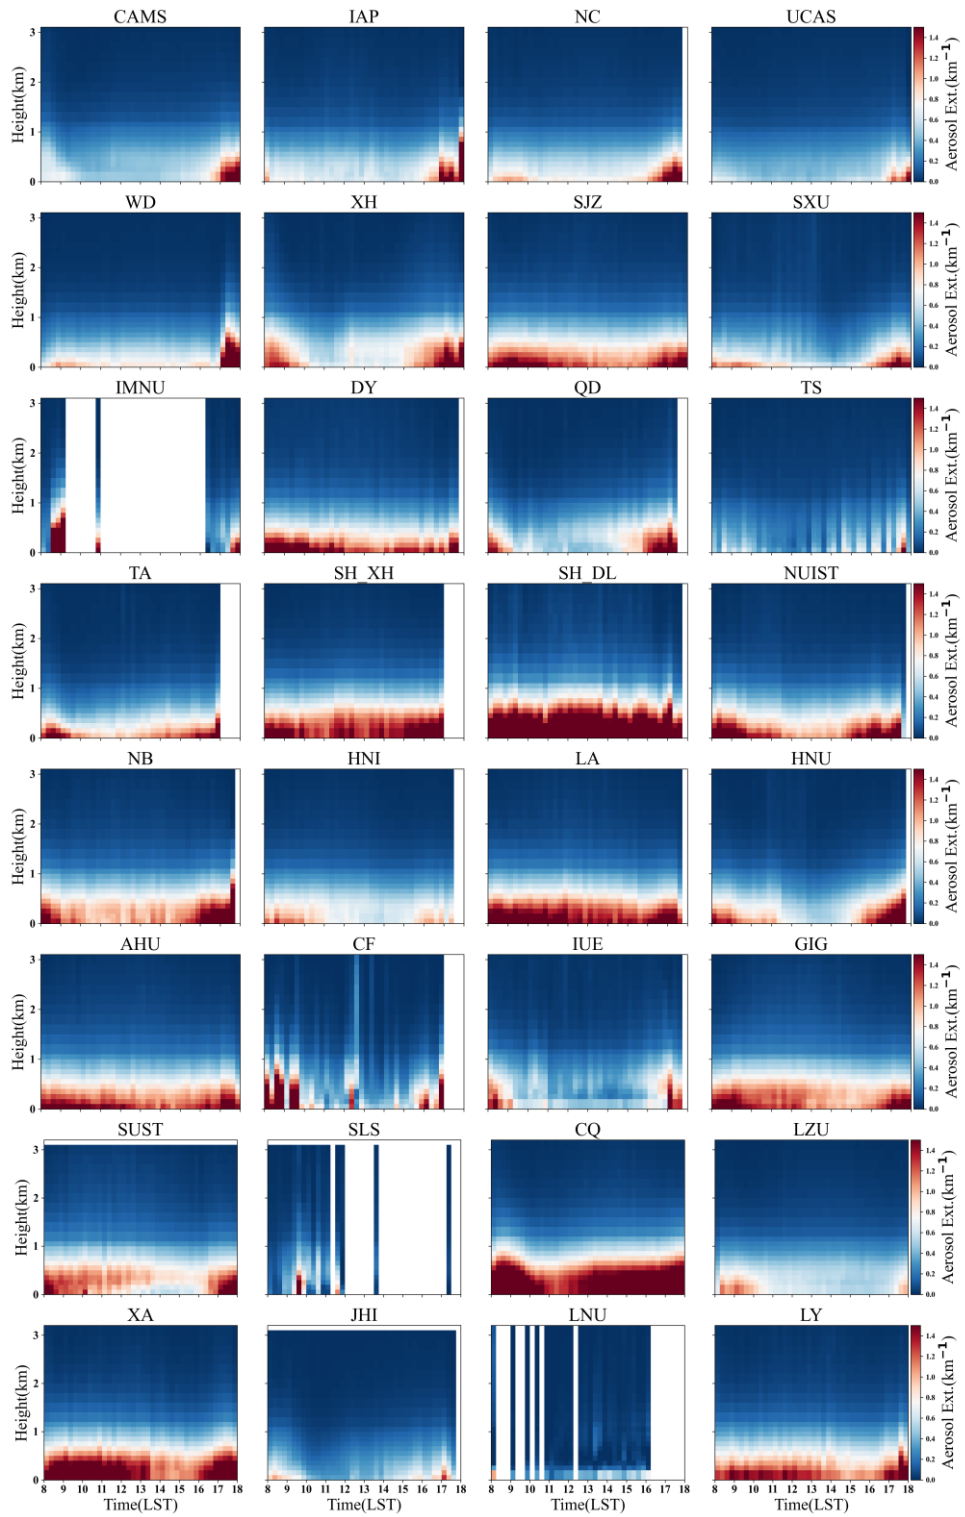

Figure S8. Diurnal variation of the winter averaged aerosol extinction vertical profiles during 2019-2023.

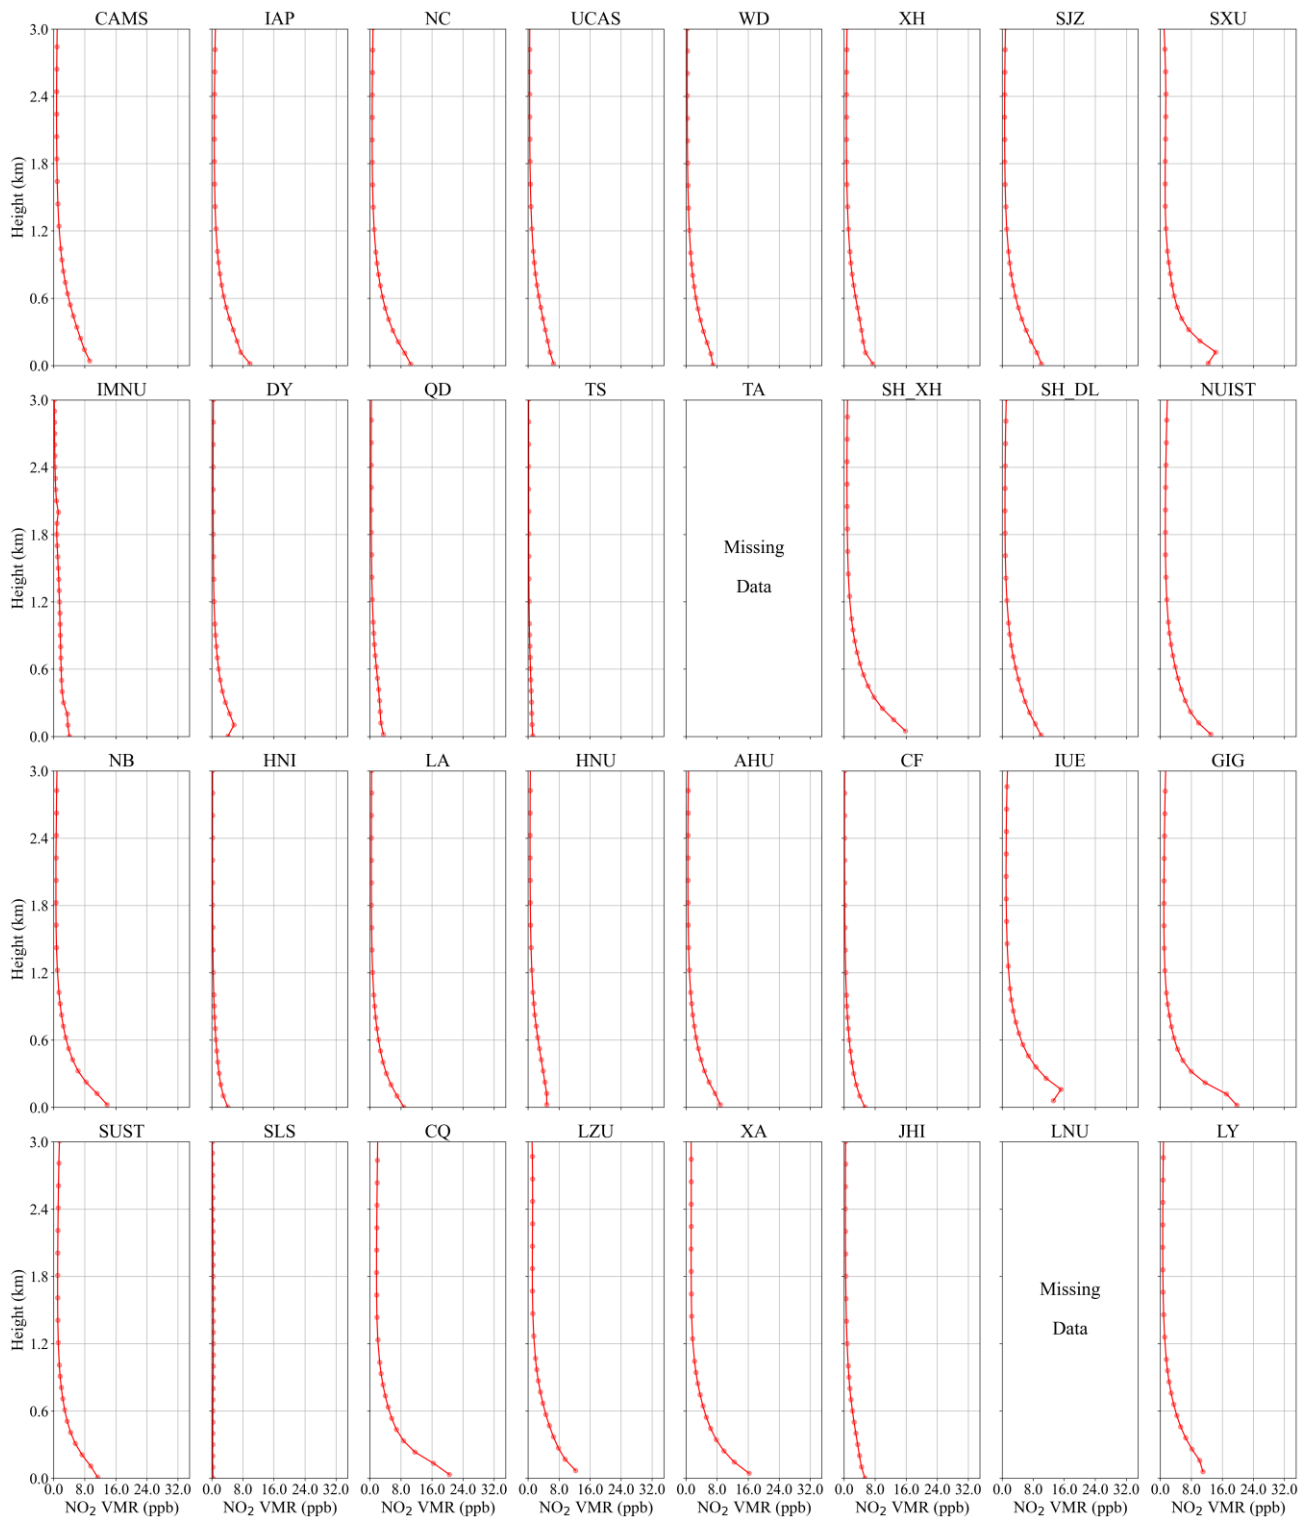

Figure S9. Spring averaged NO<sub>2</sub> vertical profiles during 2019-2023.

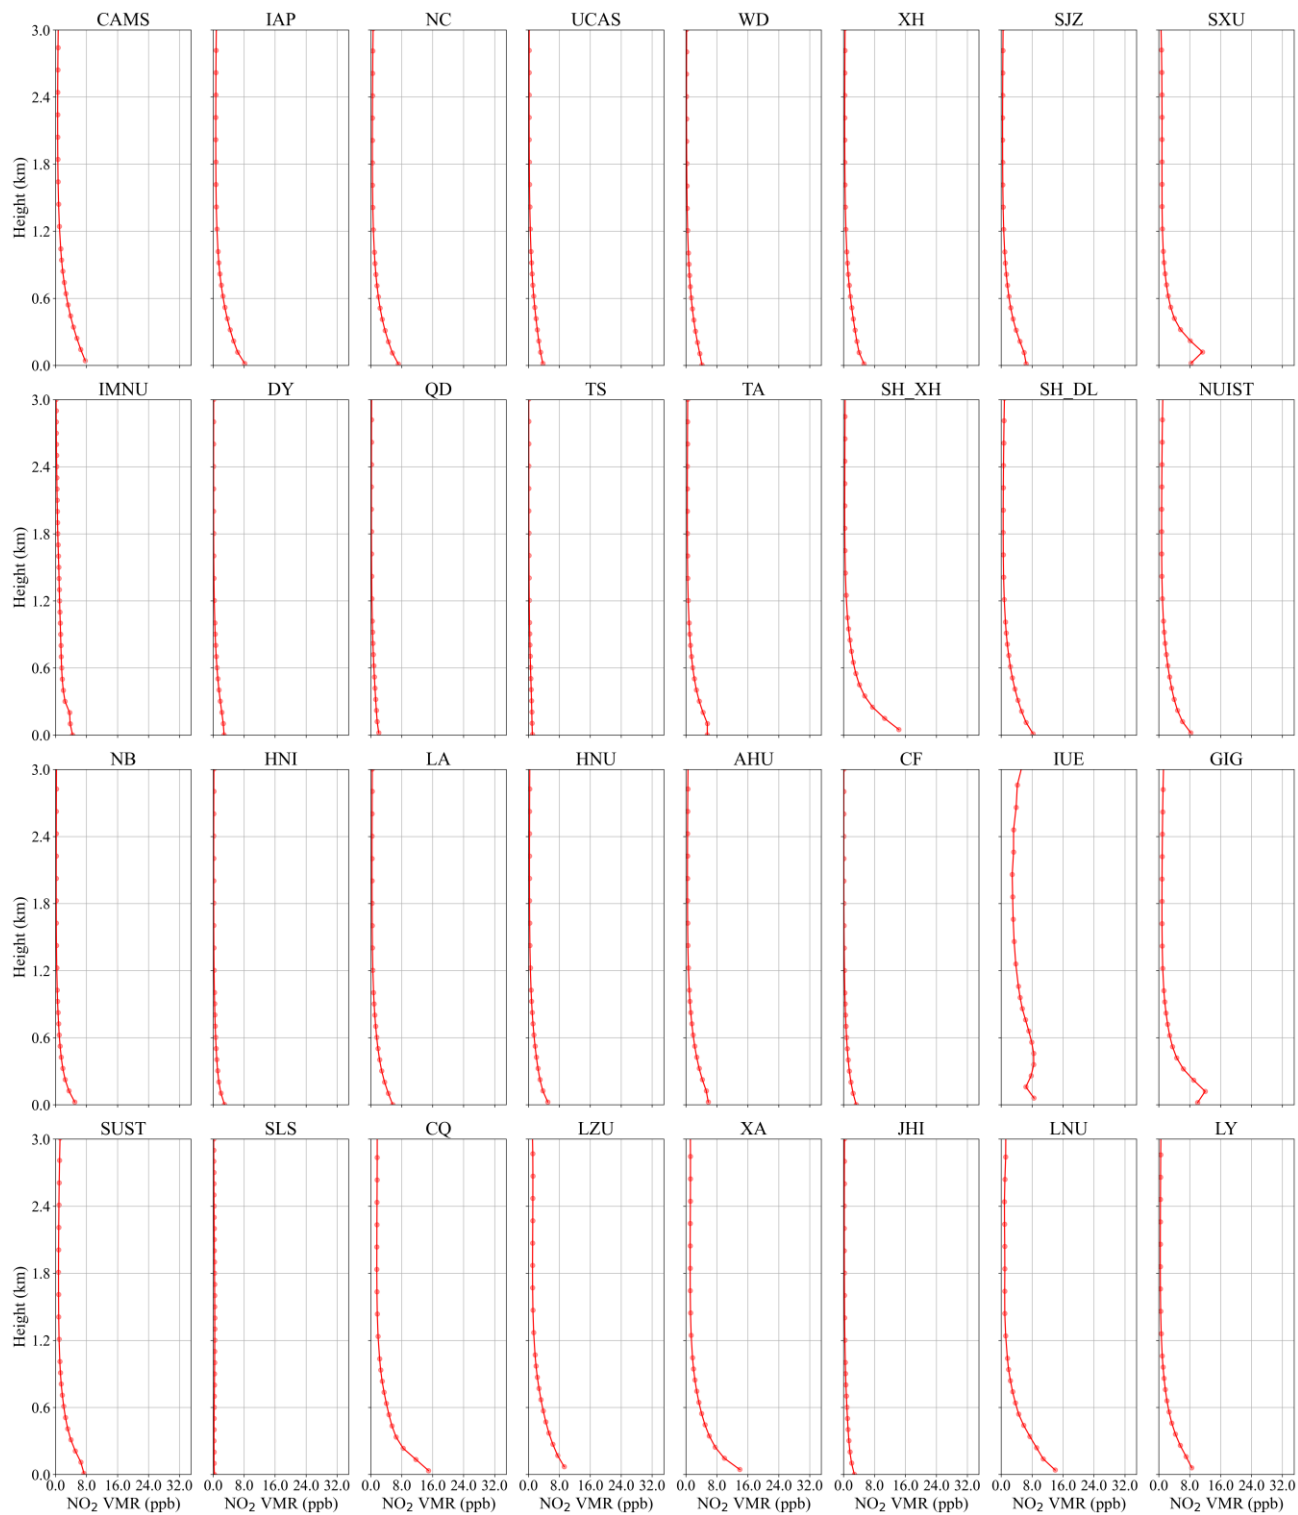

**Figure S10. Summer averaged NO<sub>2</sub> vertical profiles during 2019-2023.**

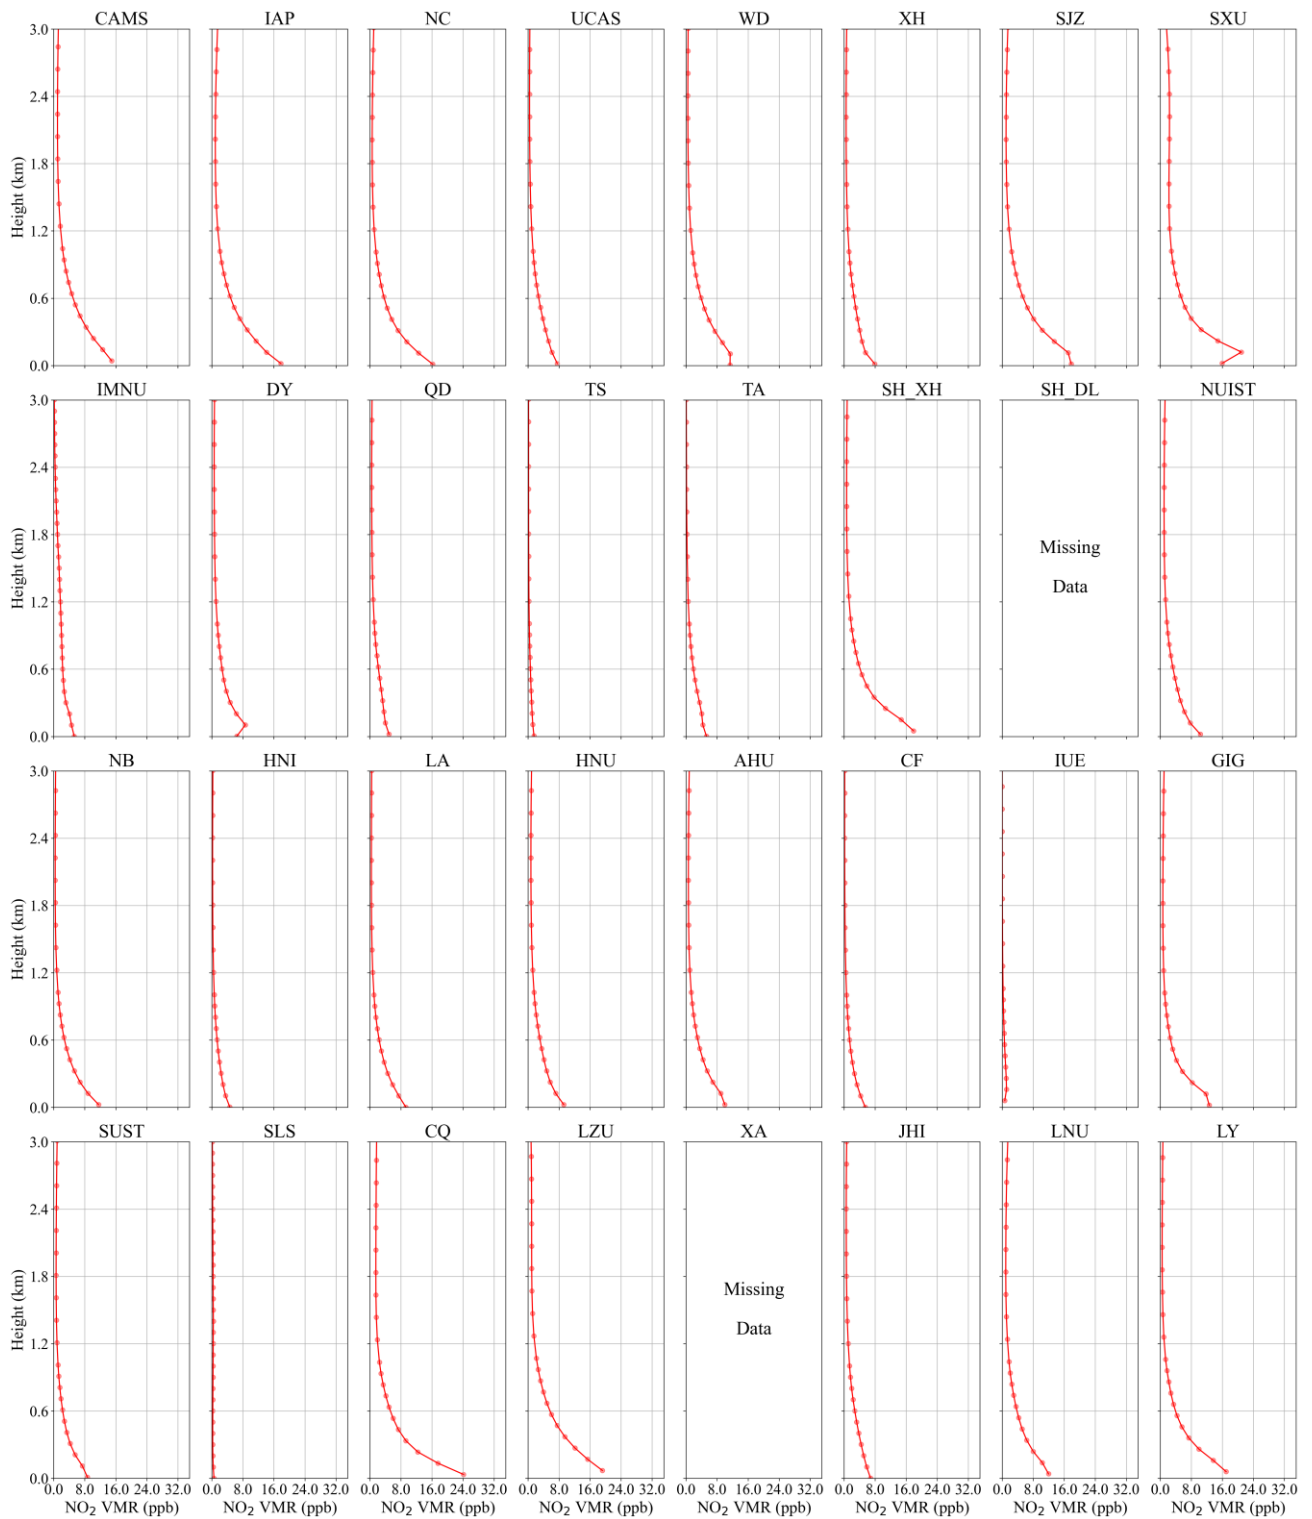

Figure S11. Autumn averaged NO<sub>2</sub> vertical profiles during 2019-2023.

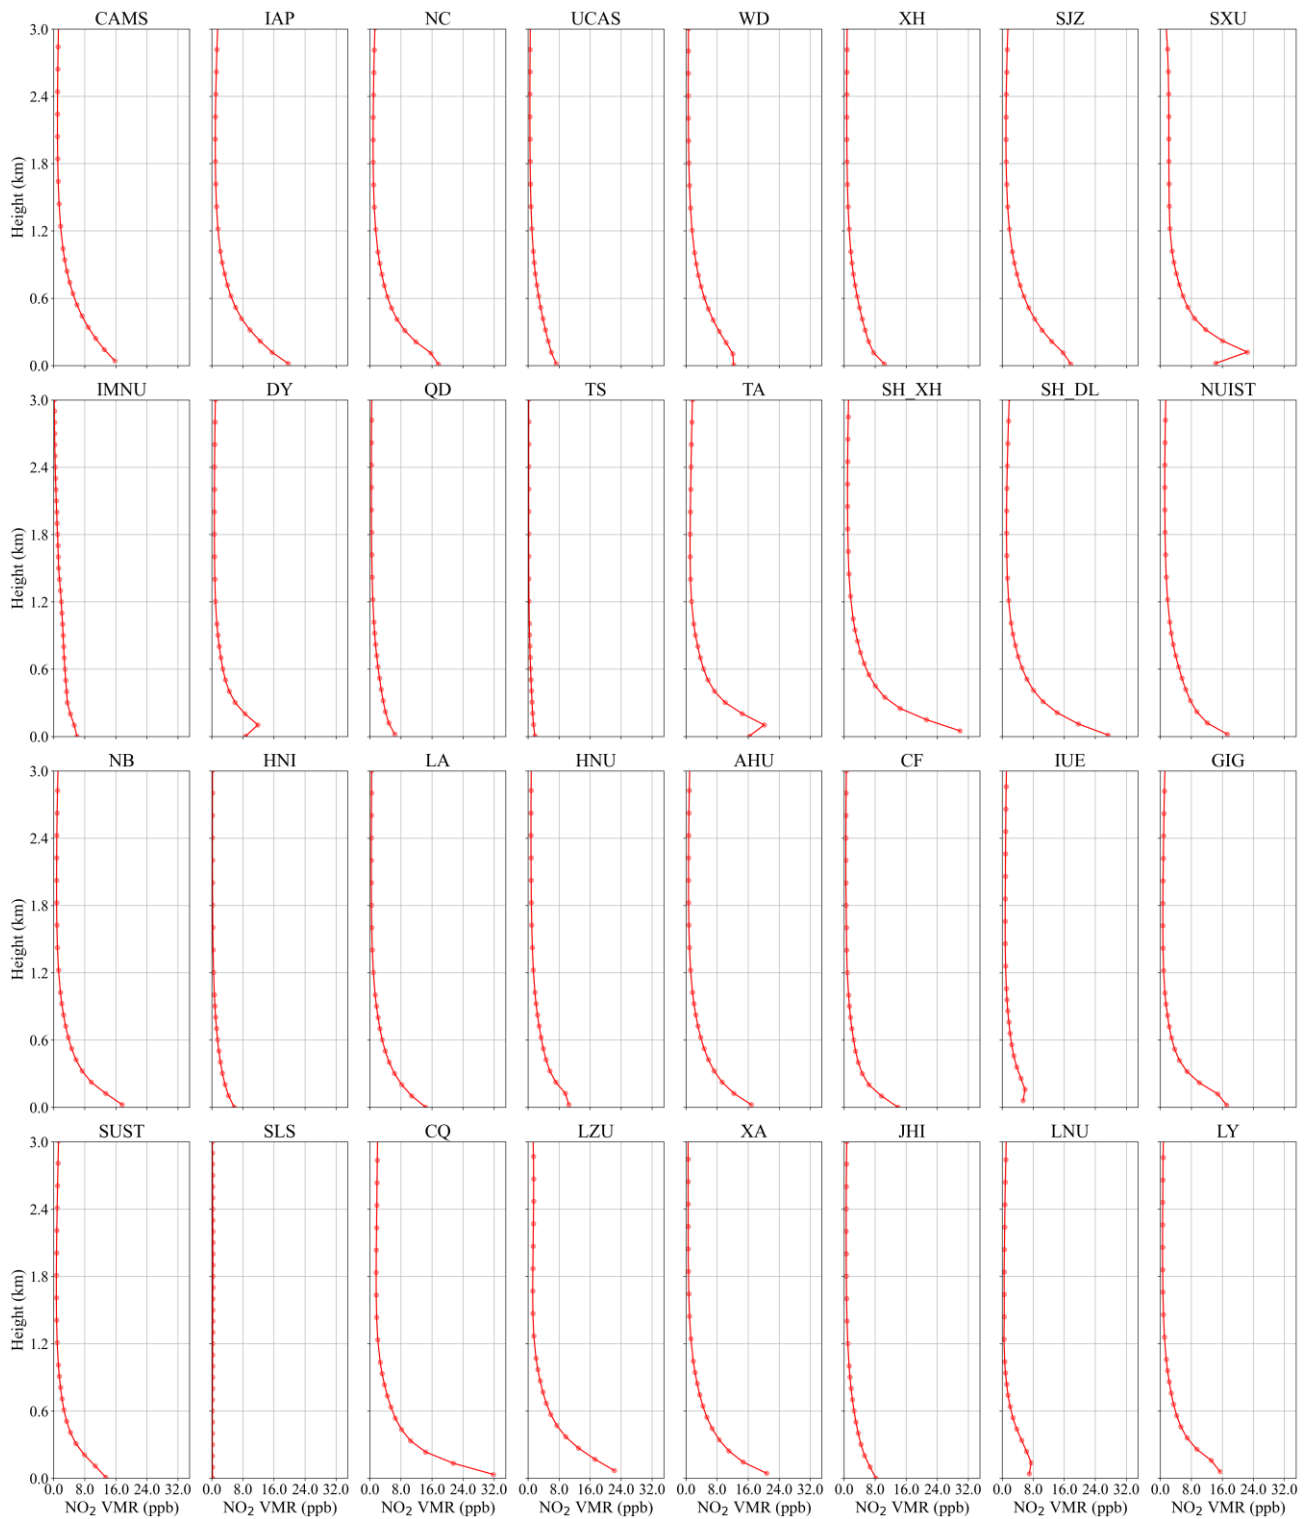

Figure S12. Winter averaged NO<sub>2</sub> vertical profiles during 2019-2023.

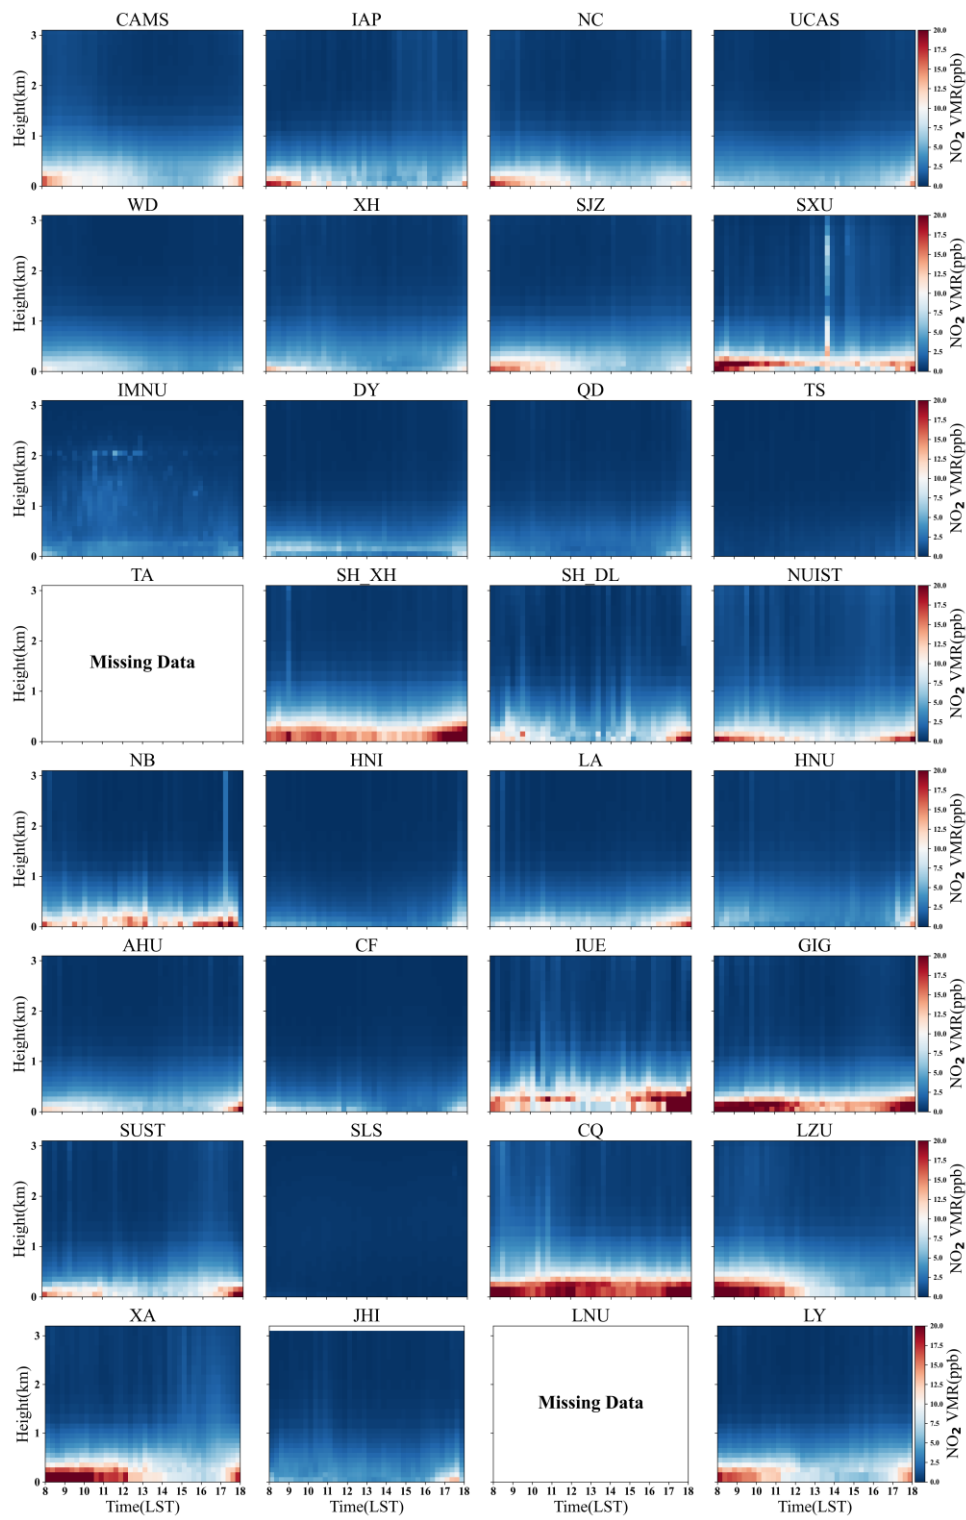

**Figure S13. Diurnal variation of the spring averaged NO<sub>2</sub> vertical profiles during 2019-2023.**

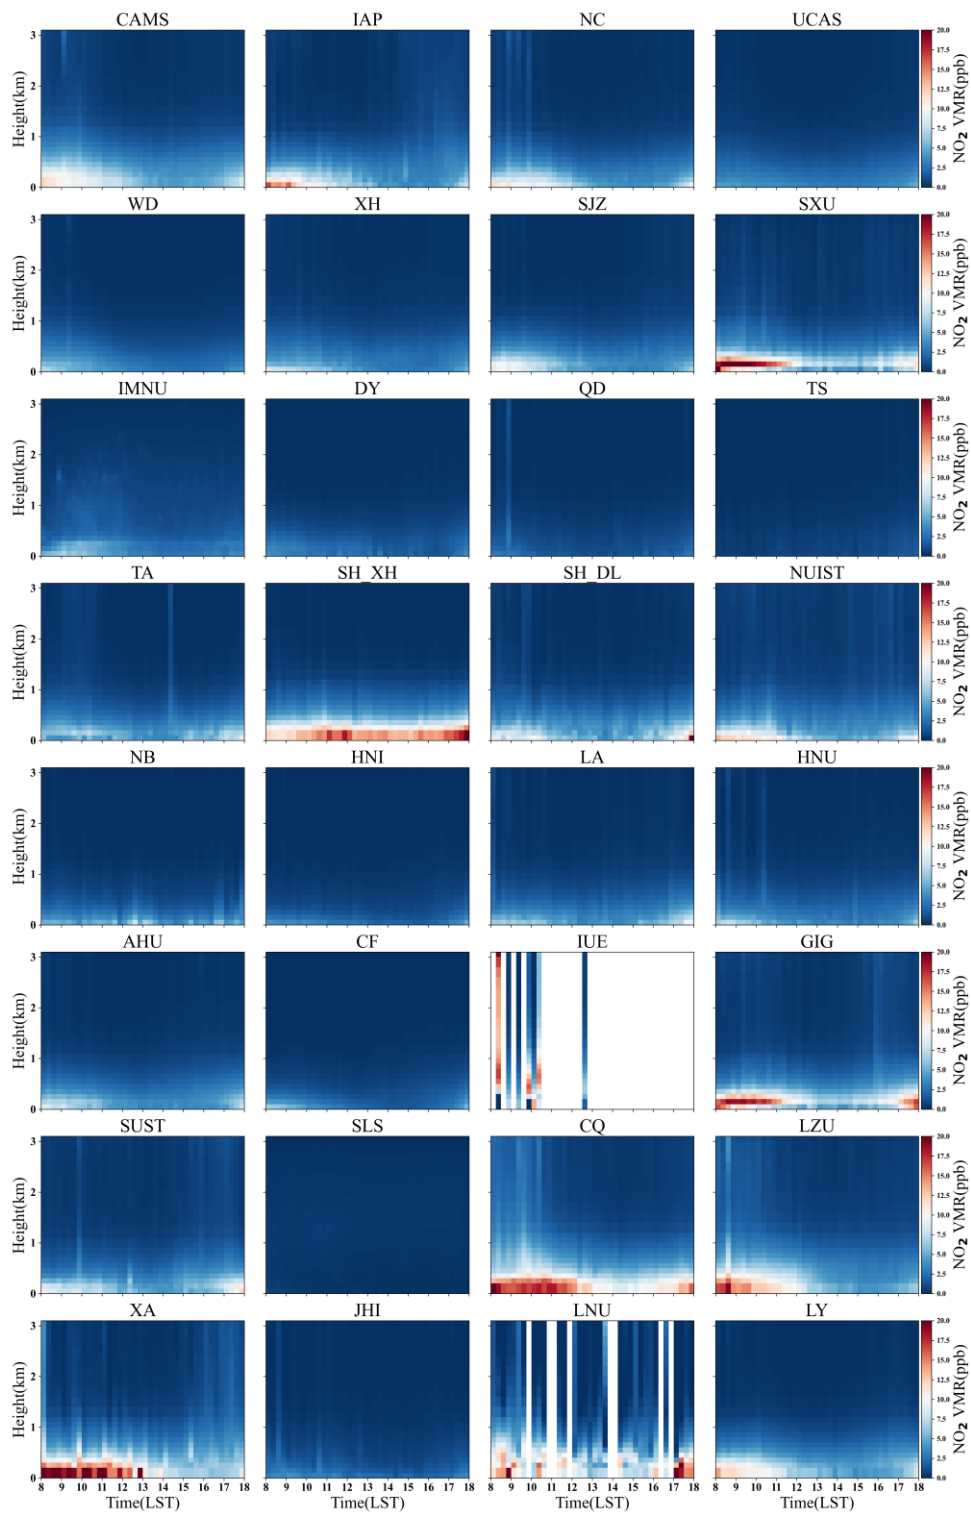

Figure S14. Diurnal variation of the summer averaged NO<sub>2</sub> vertical profiles during 2019-2023.



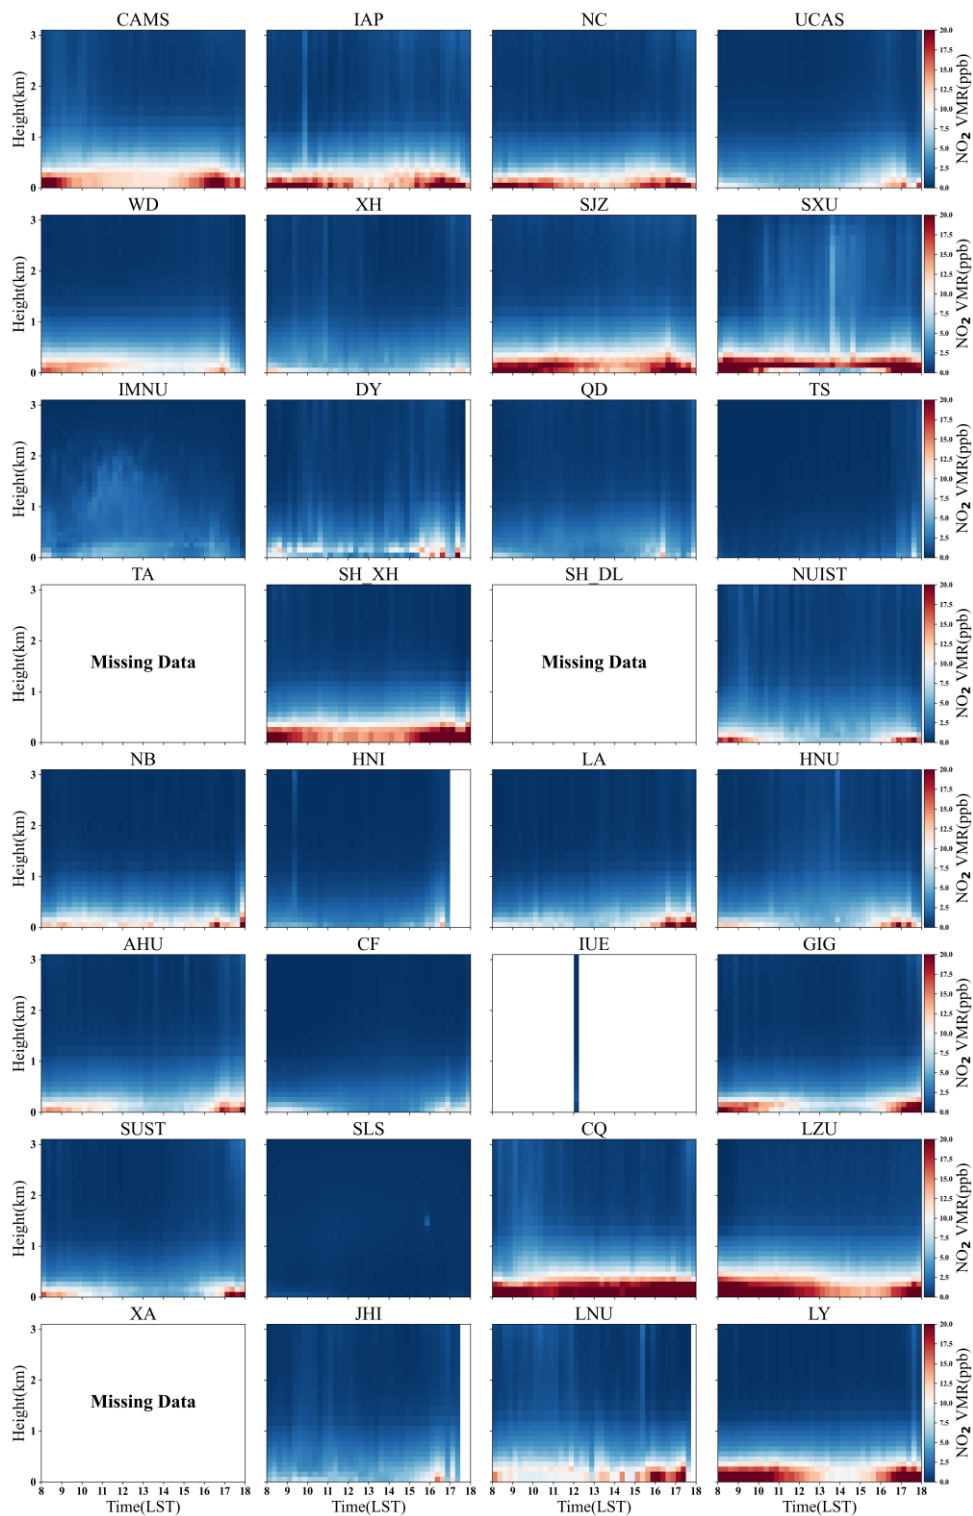

**Figure S15. Diurnal variation of the autumn averaged NO<sub>2</sub> vertical profiles during 2019-2023.**

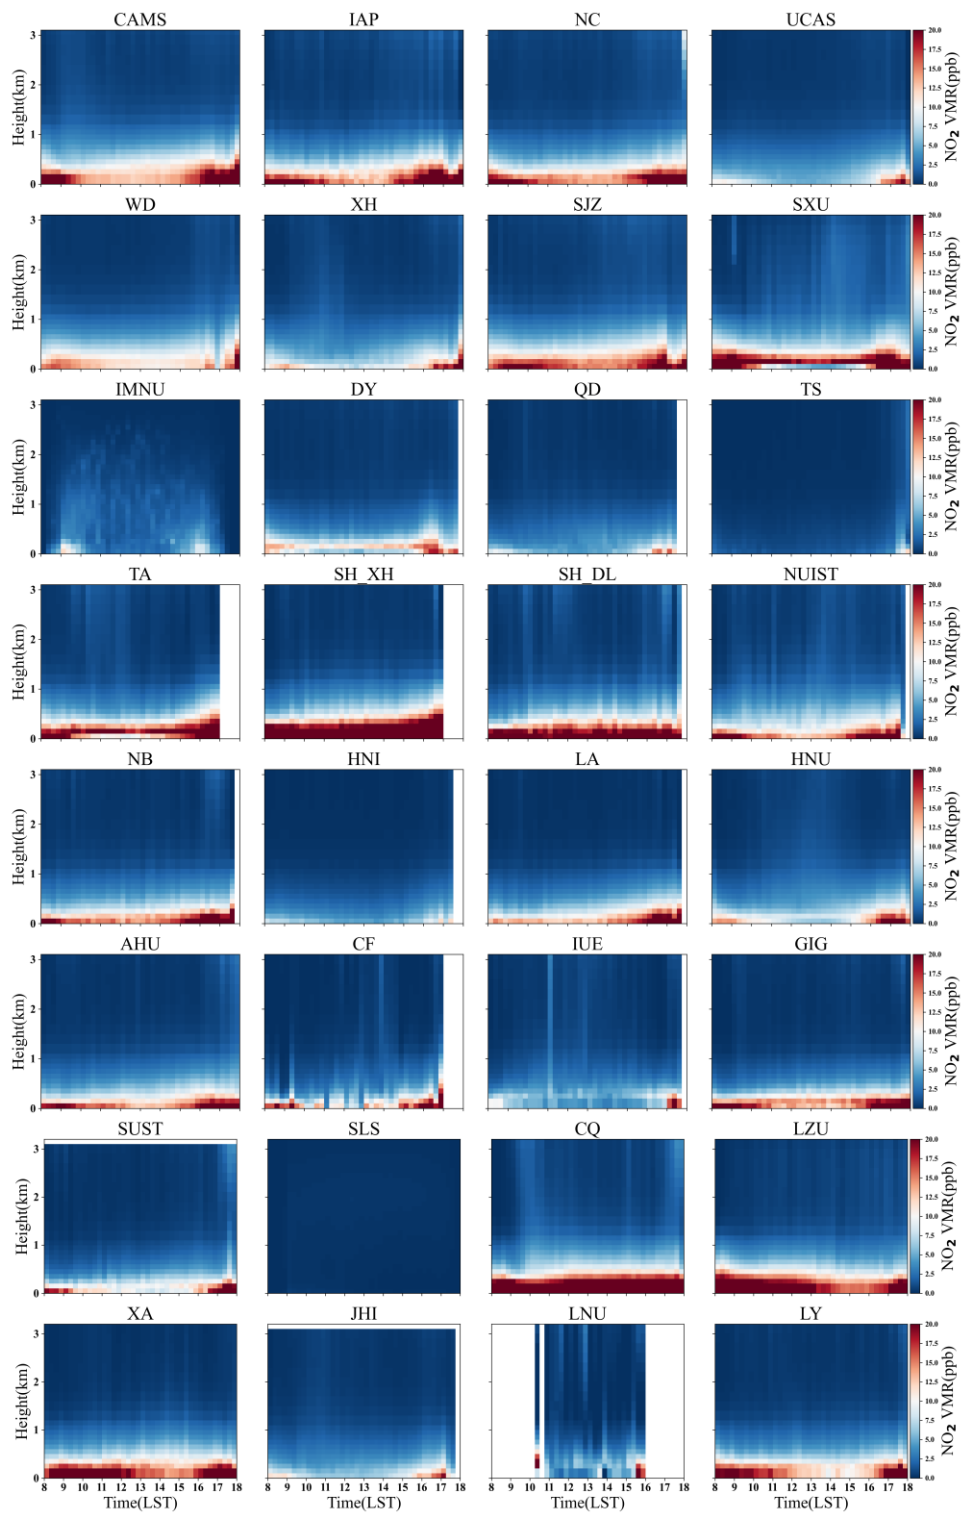

Figure S16. Diurnal variation of the winter averaged NO<sub>2</sub> vertical profiles during 2019-2023.

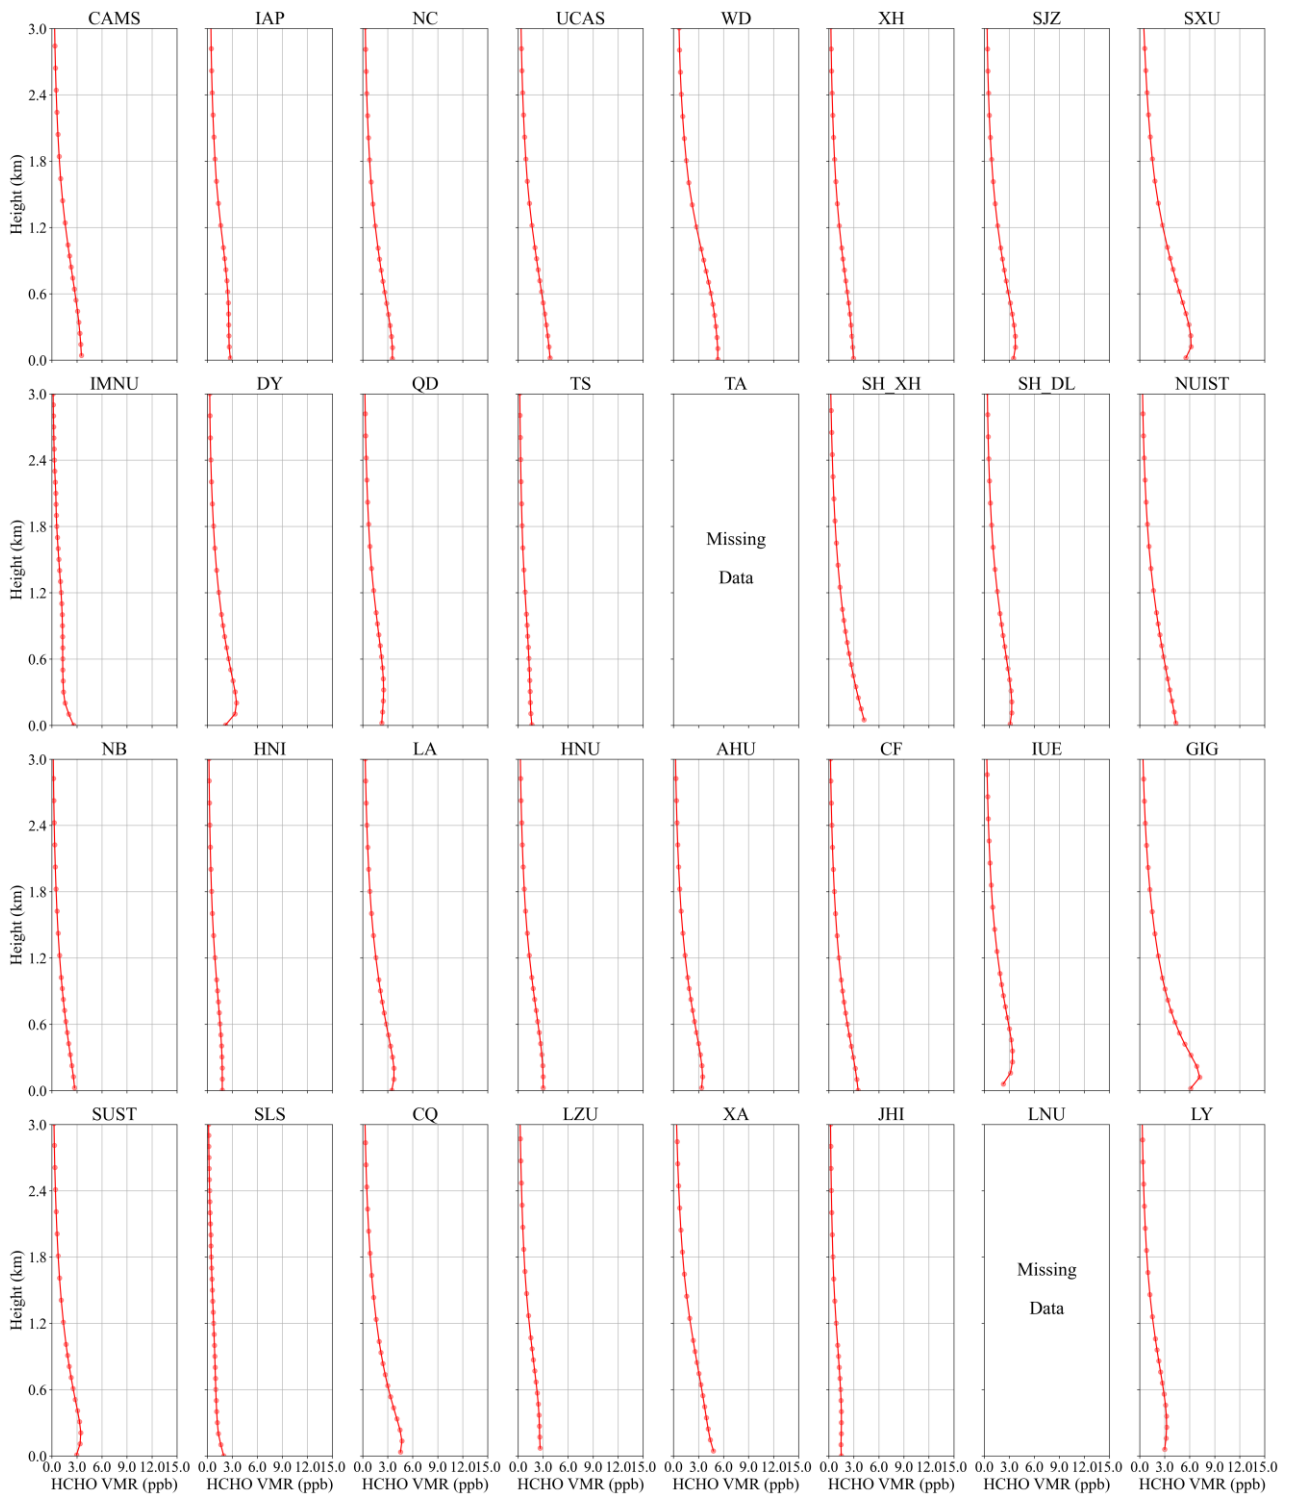

Figure S17. Spring averaged HCHO vertical profiles during 2019-2023.

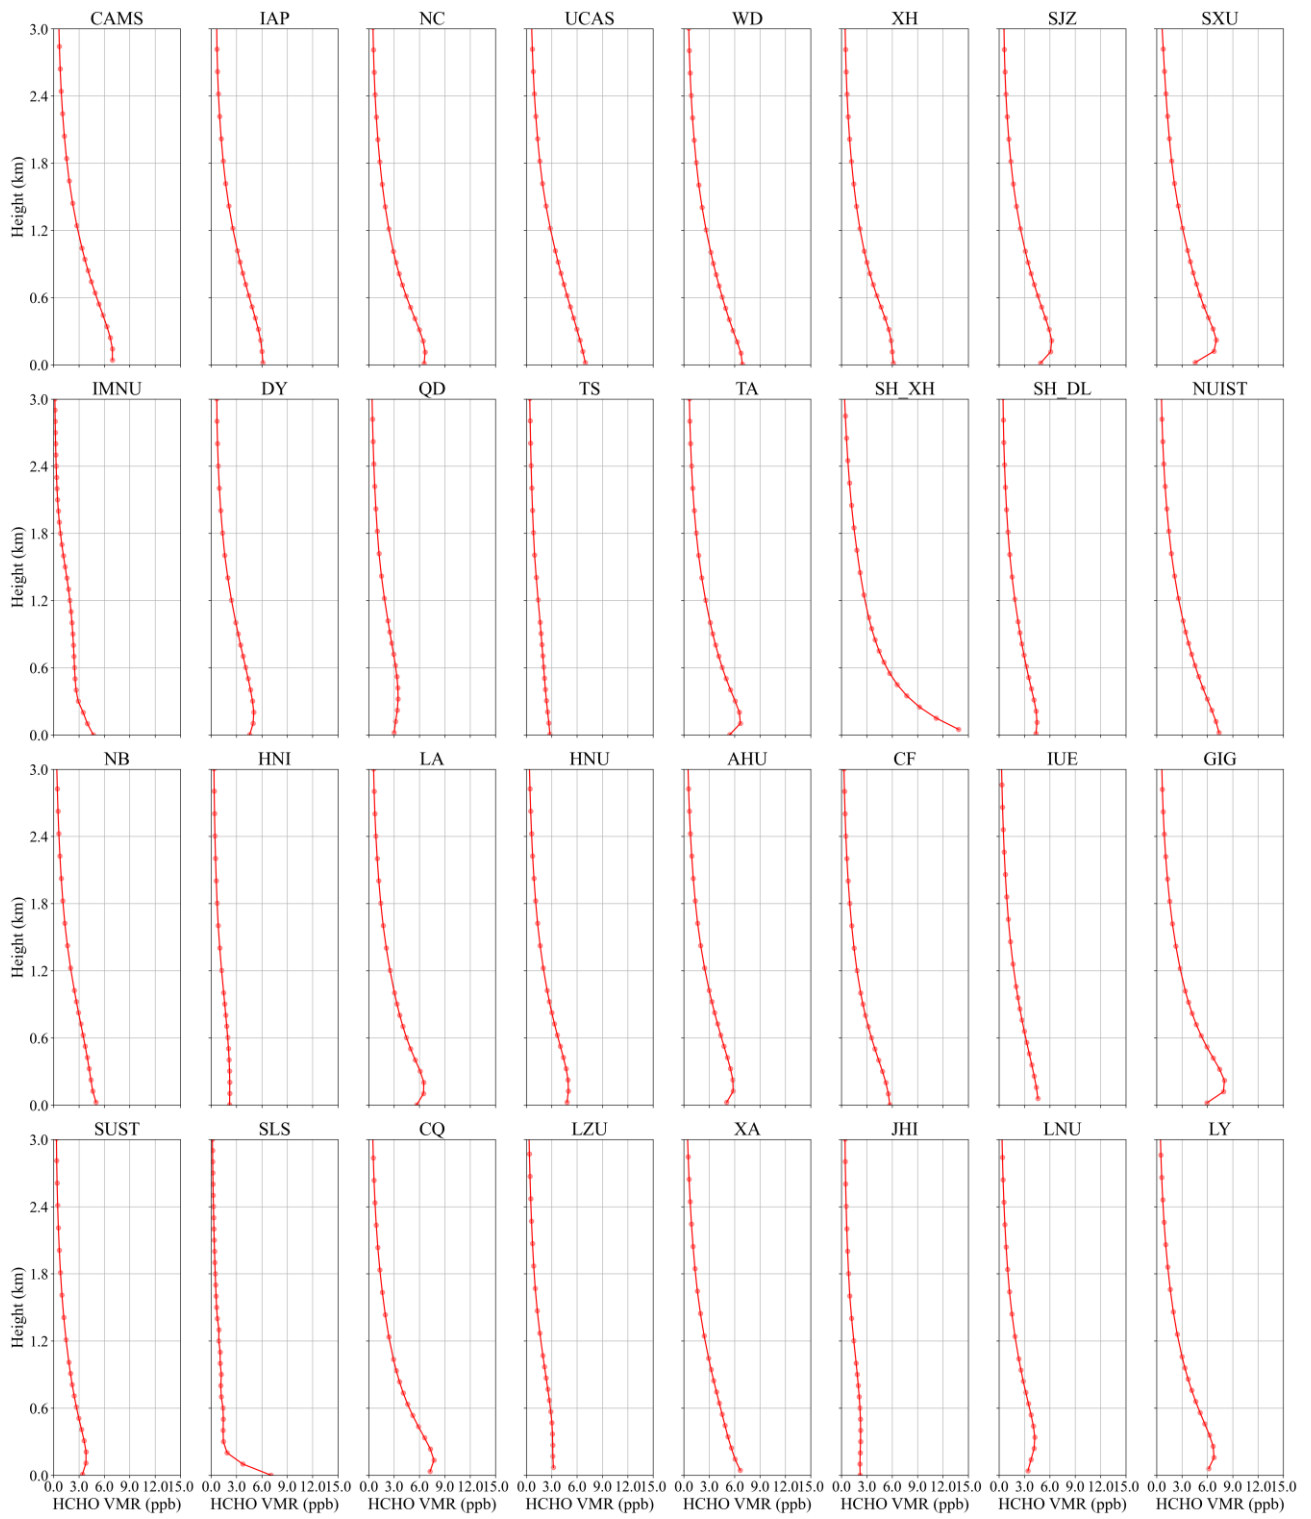

**Figure S18. Summer averaged HCHO vertical profiles during 2019-2023.**

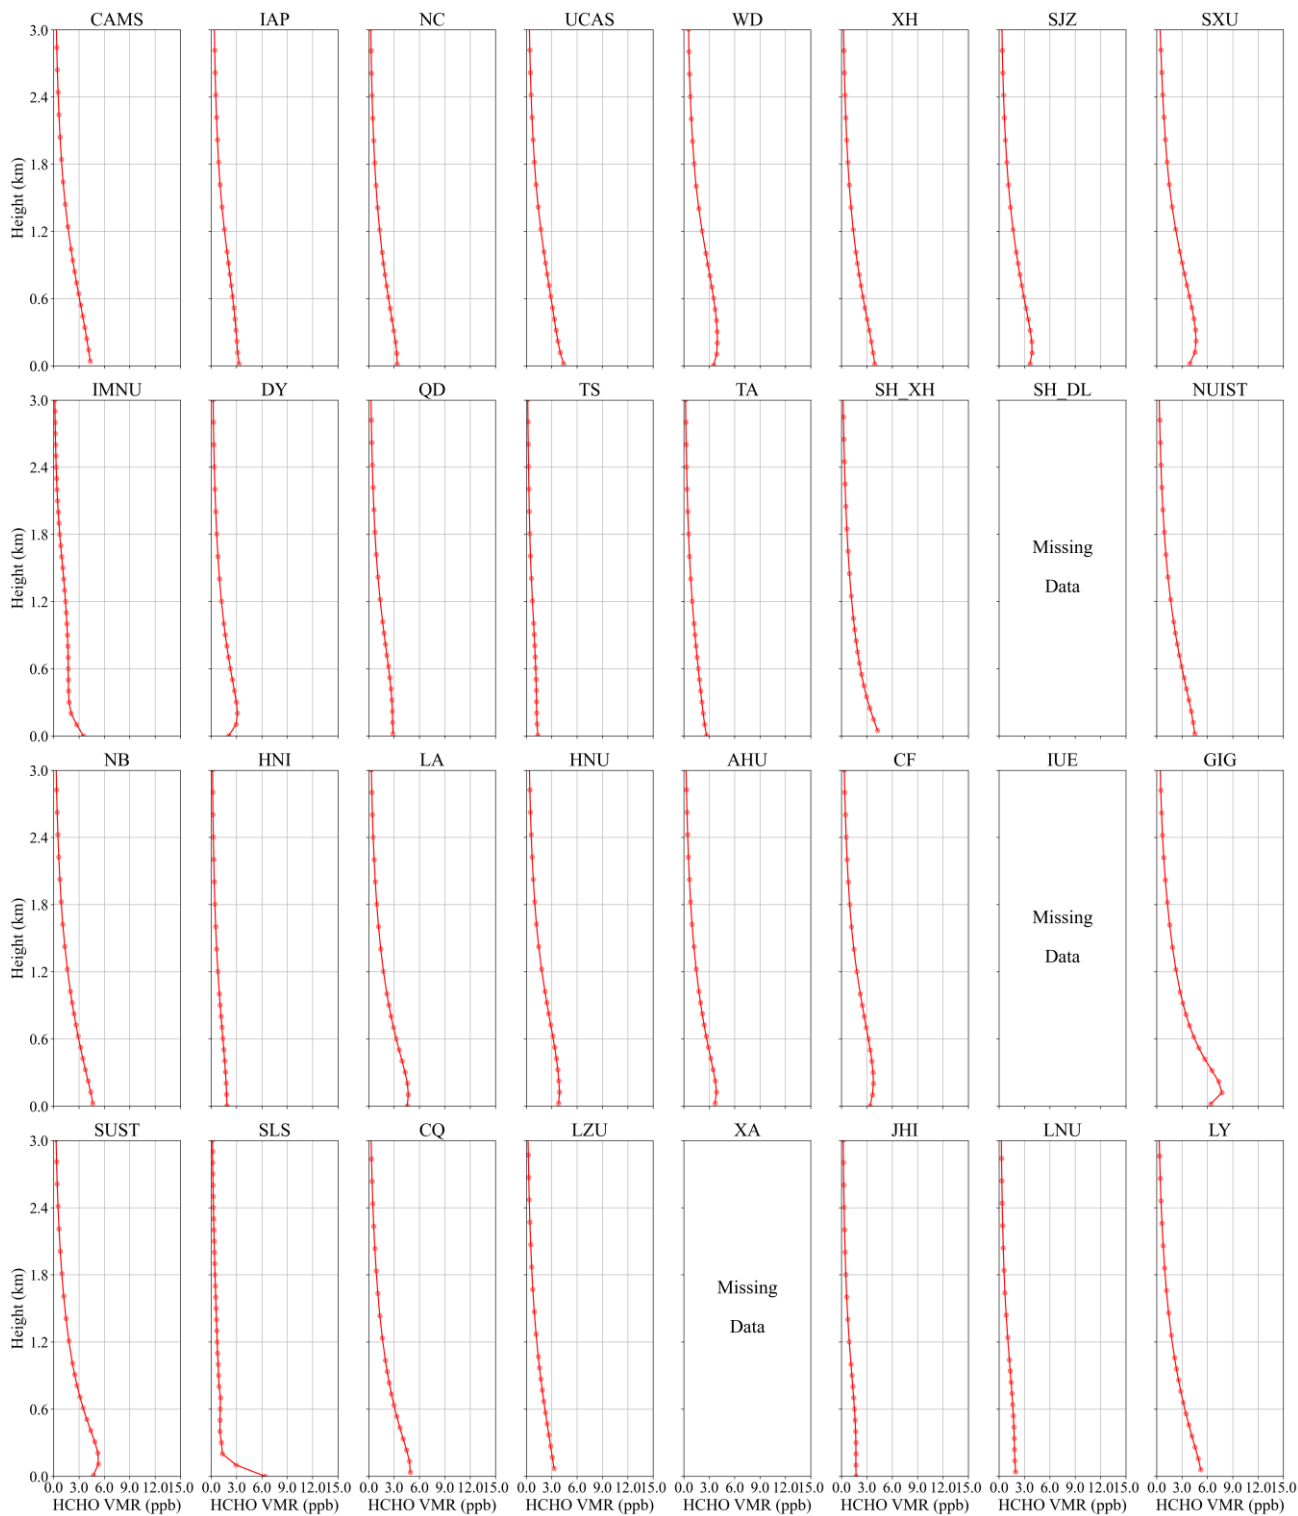

Figure S19. Autumn averaged HCHO vertical profiles during 2019-2023.

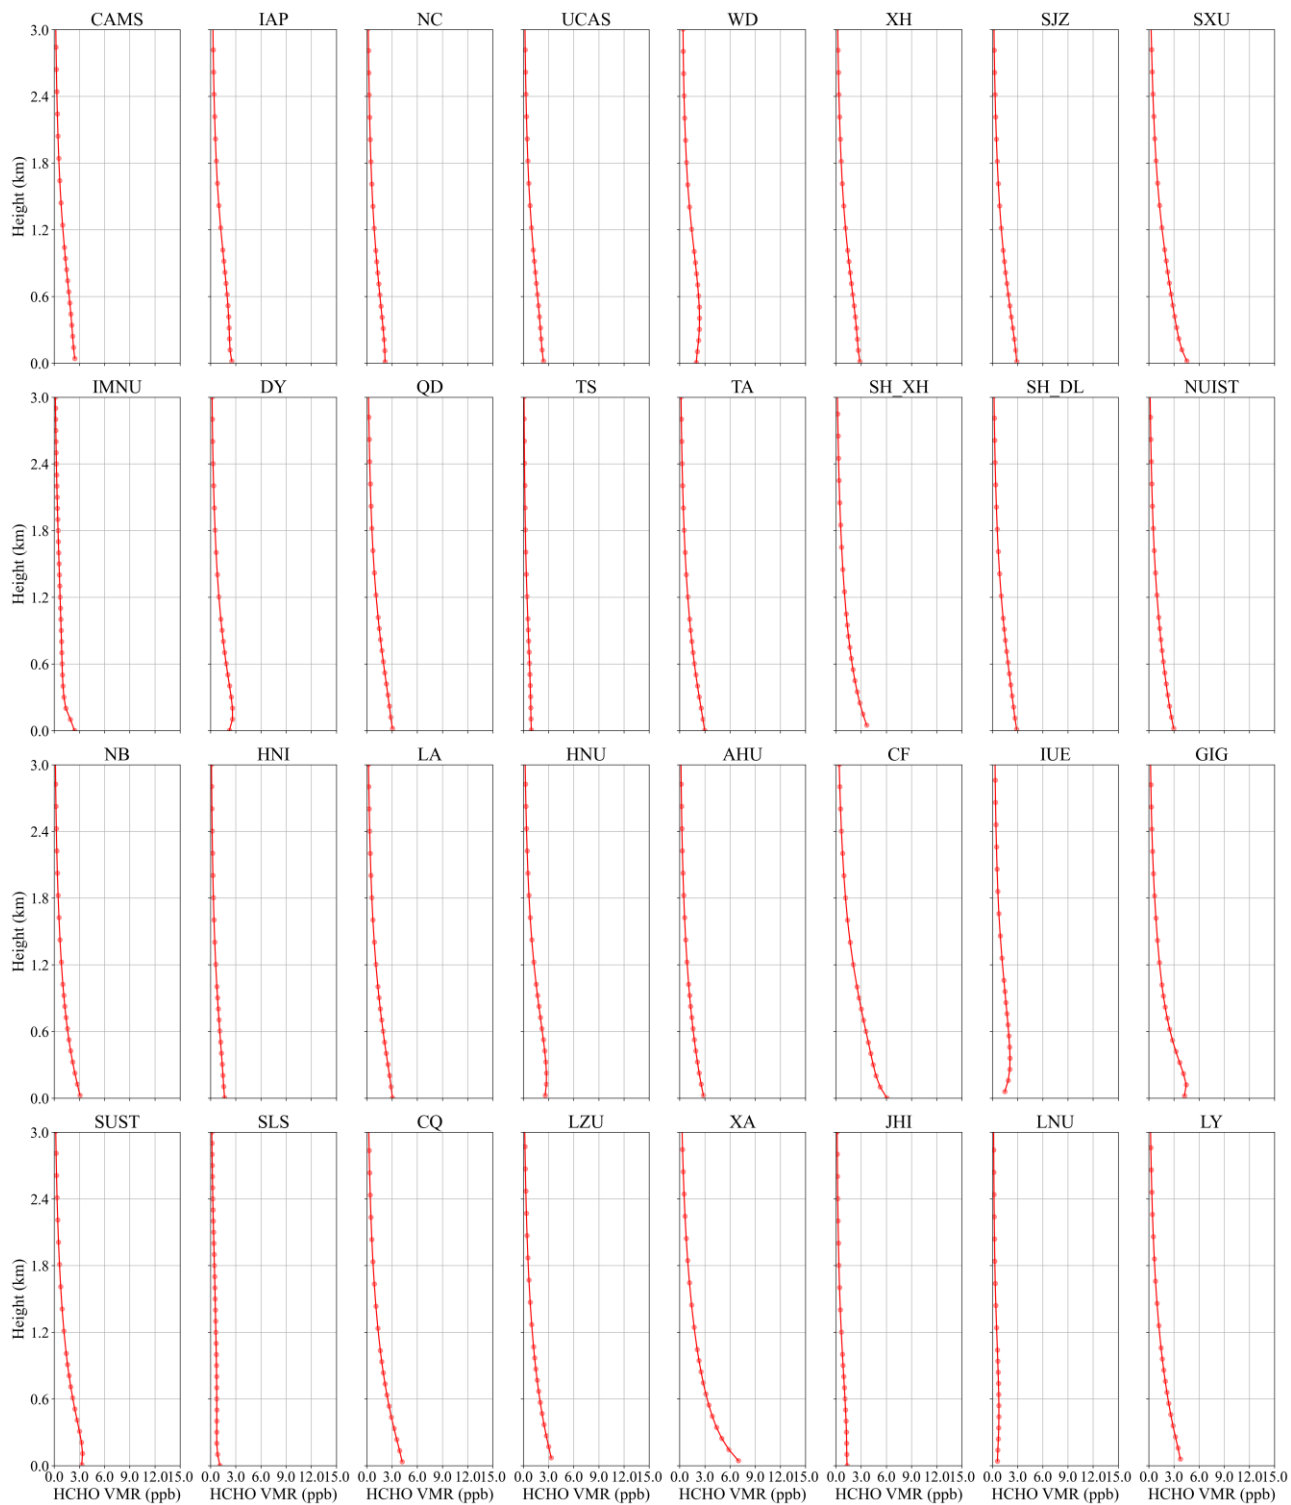

**Figure S20. Winter averaged HCHO vertical profiles during 2019-2023.**

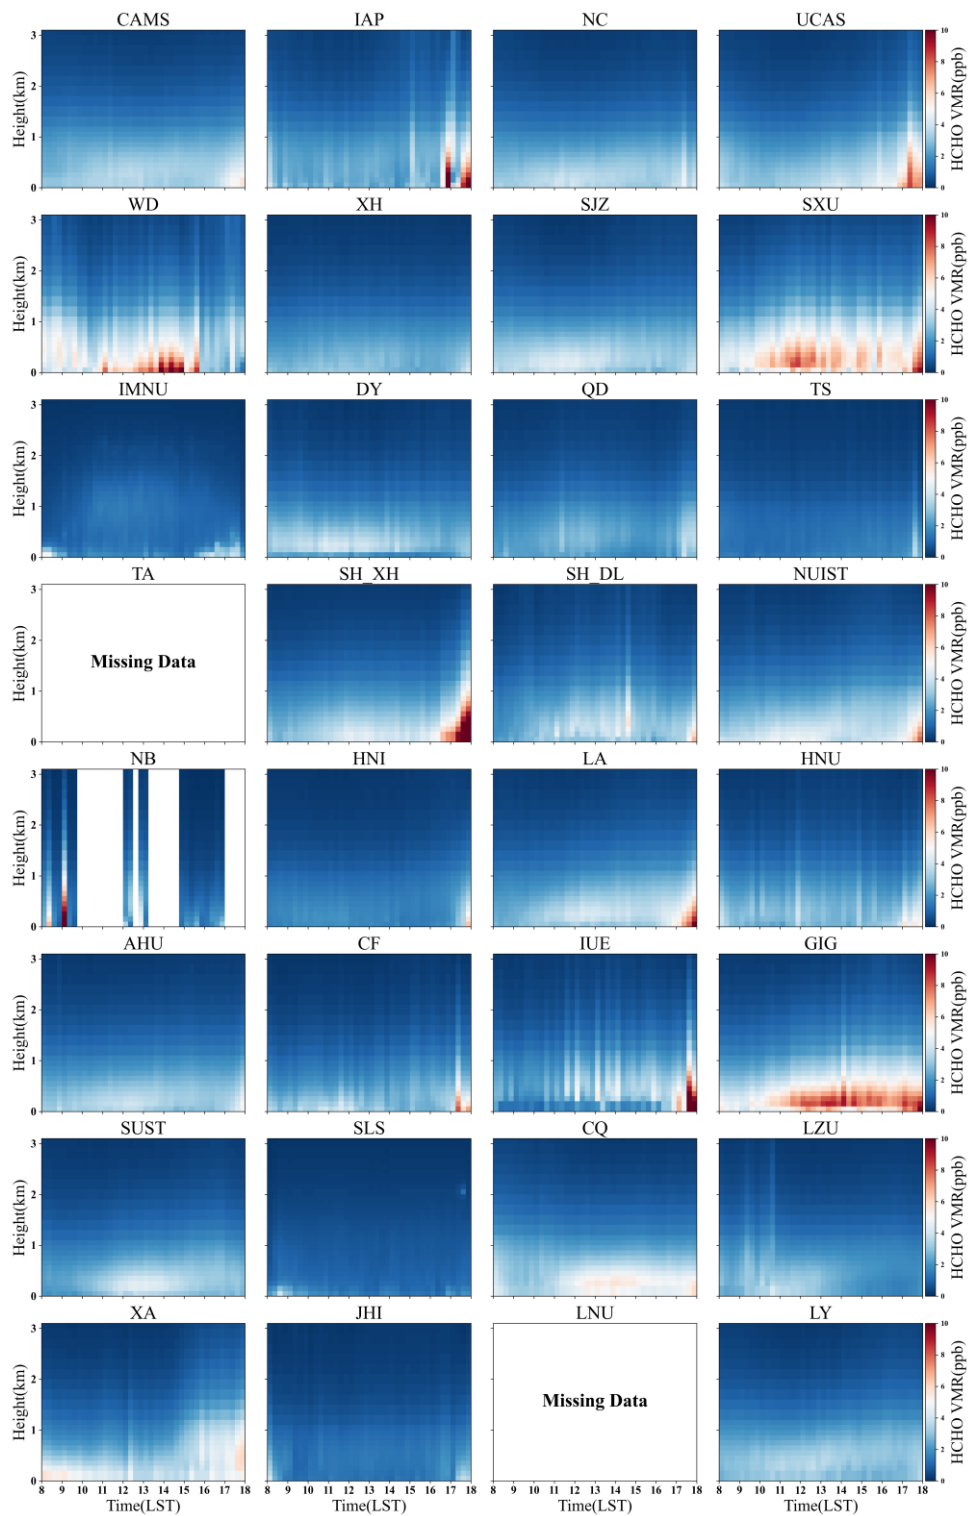

Figure S21. Diurnal variation of the spring averaged HCHO vertical profiles during 2019-2023.

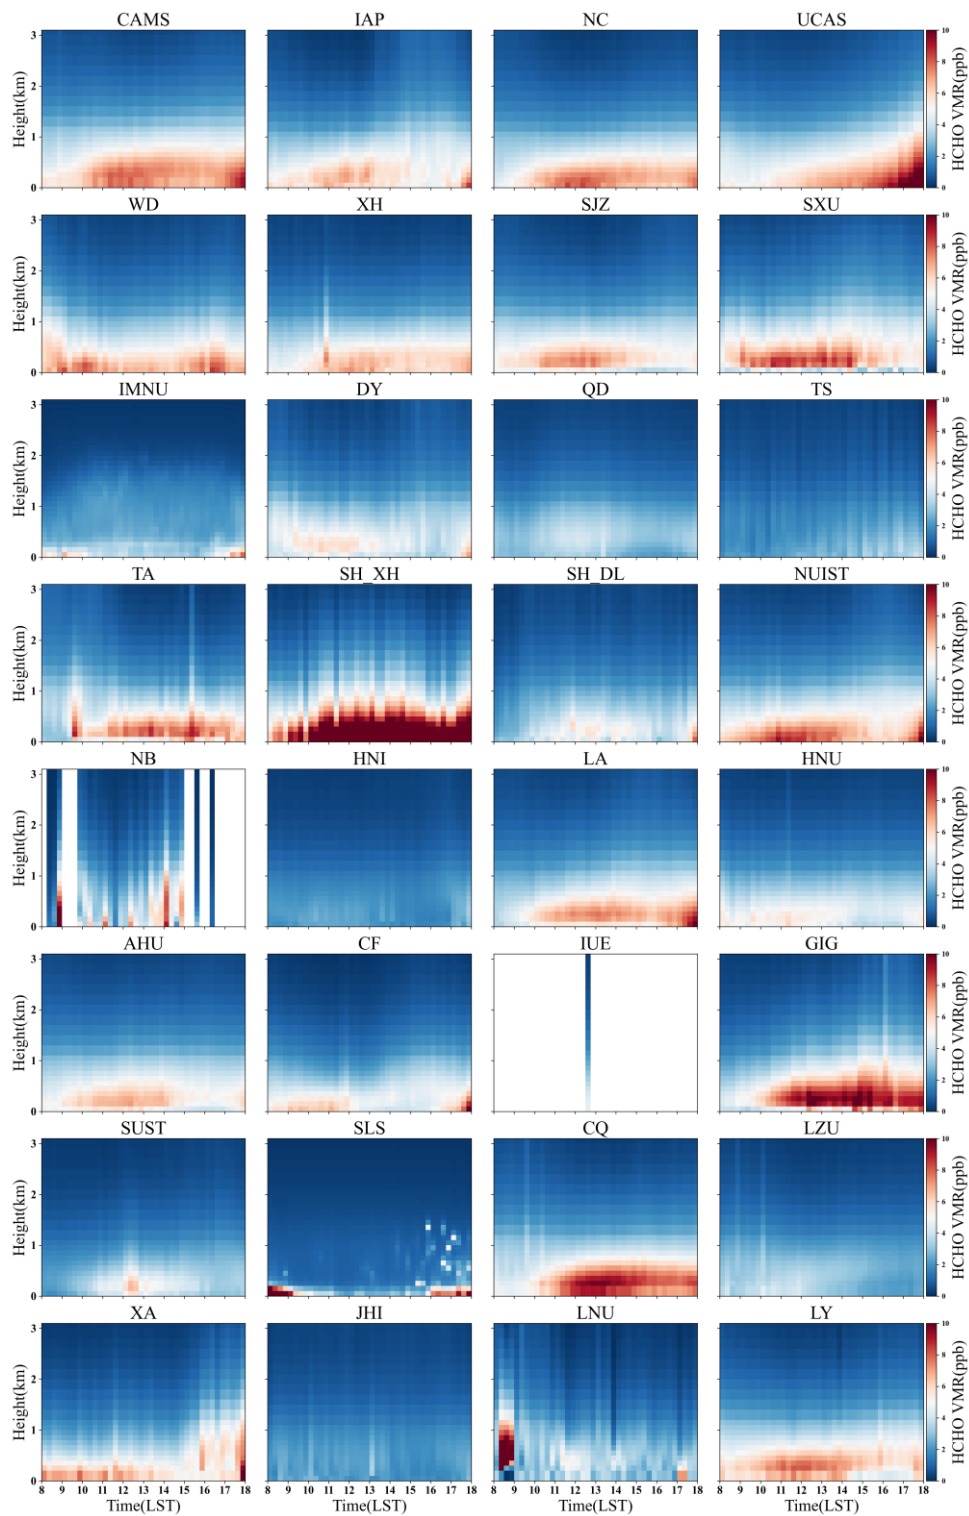

Figure S22. Diurnal variation of the summer averaged HCHO vertical profiles during 2019-2023.



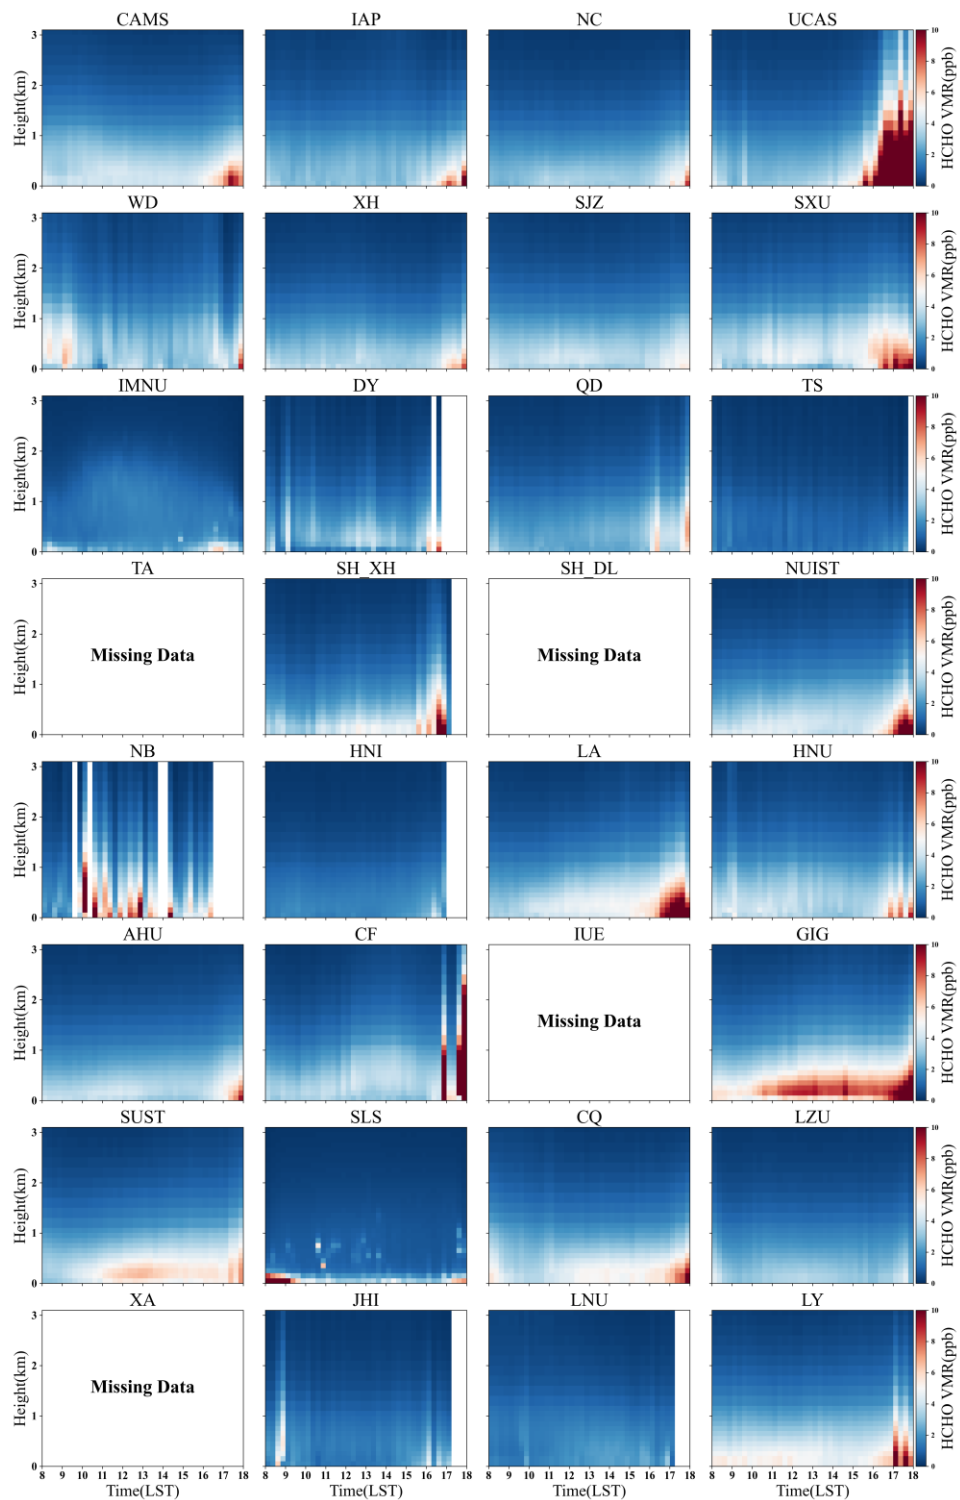

**Figure S23. Diurnal variation of the autumn averaged HCHO vertical profiles during 2019-2023.**

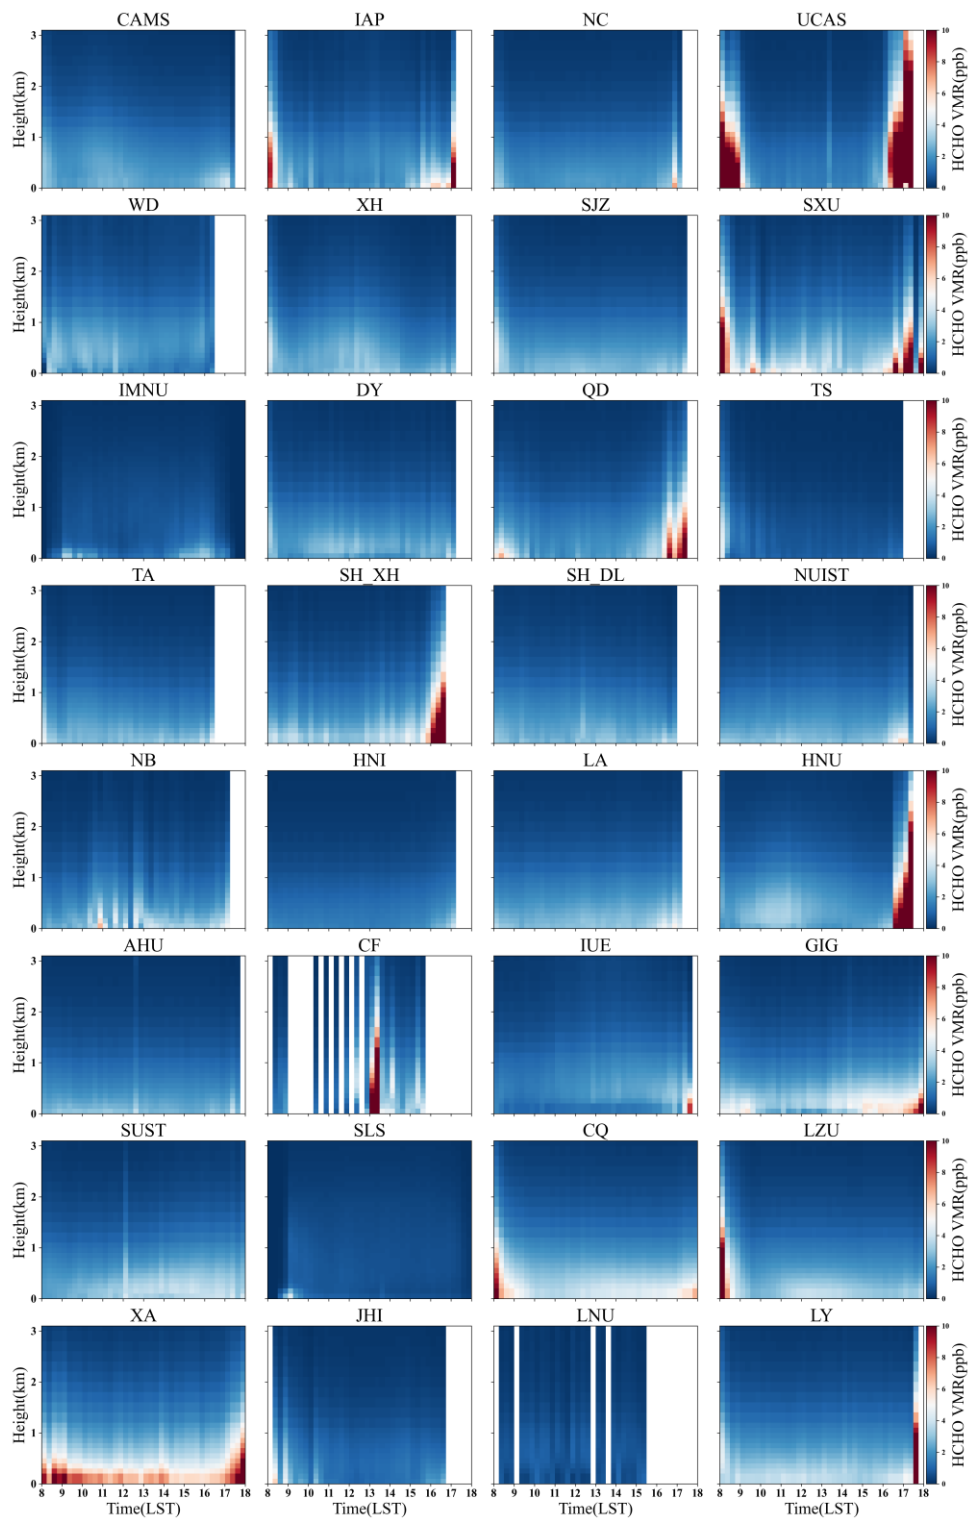

Figure S24. Diurnal variation of the winter averaged HCHO vertical profiles during 2019-2023.

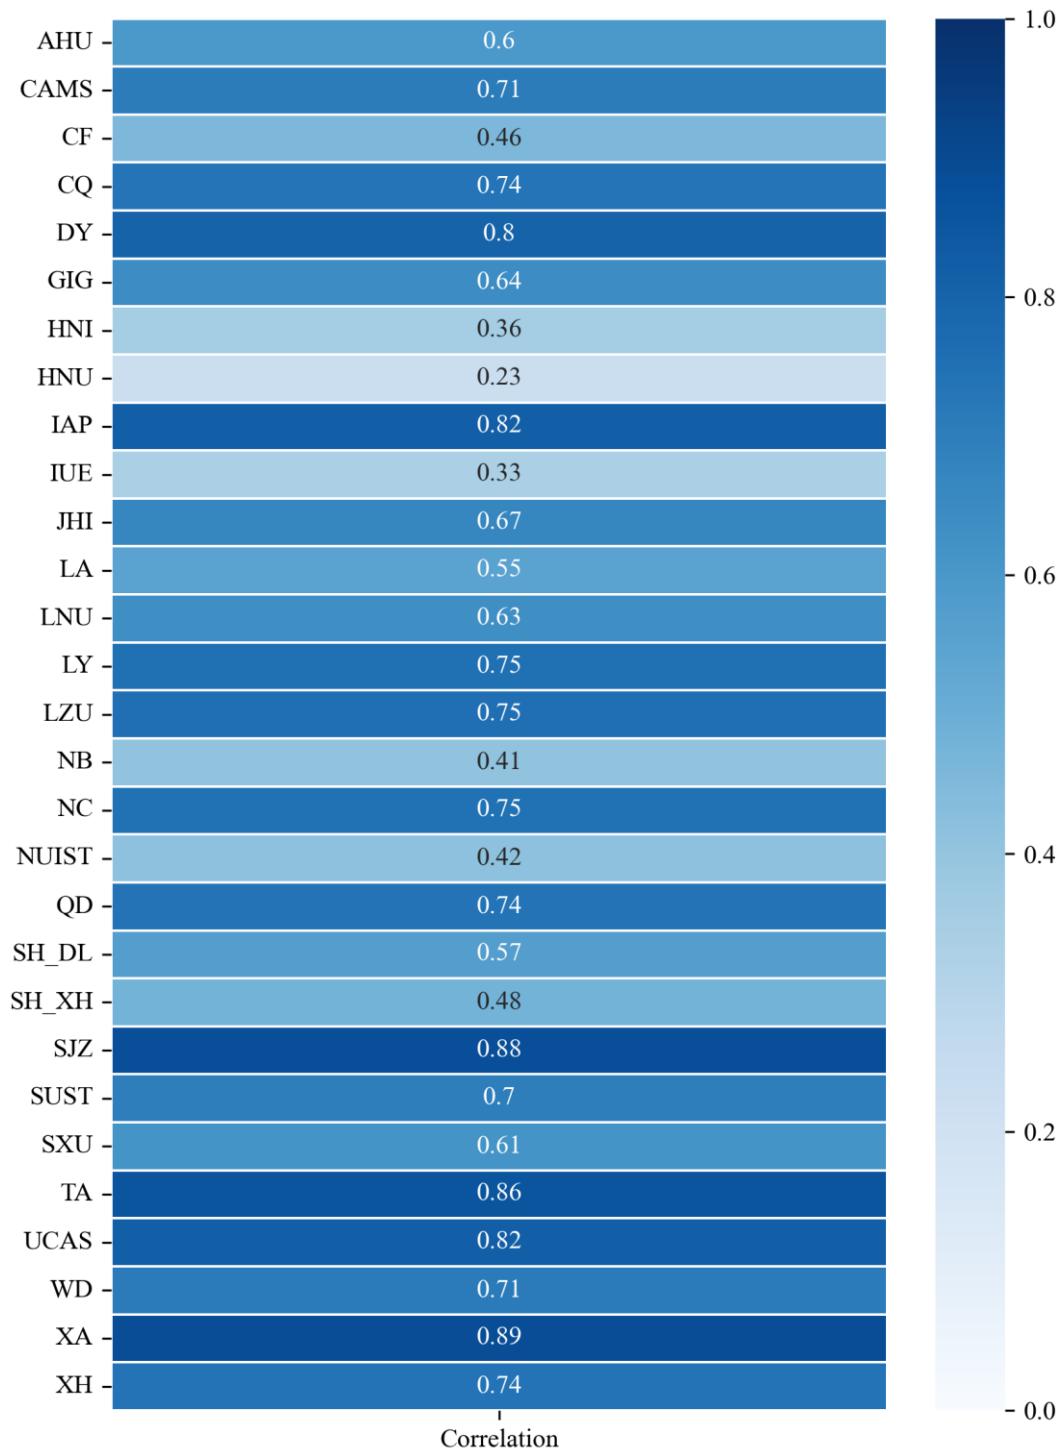

**Figure S25. Correlation of surface AEC measured at each site and PM2.5 measured by CNEMC.**

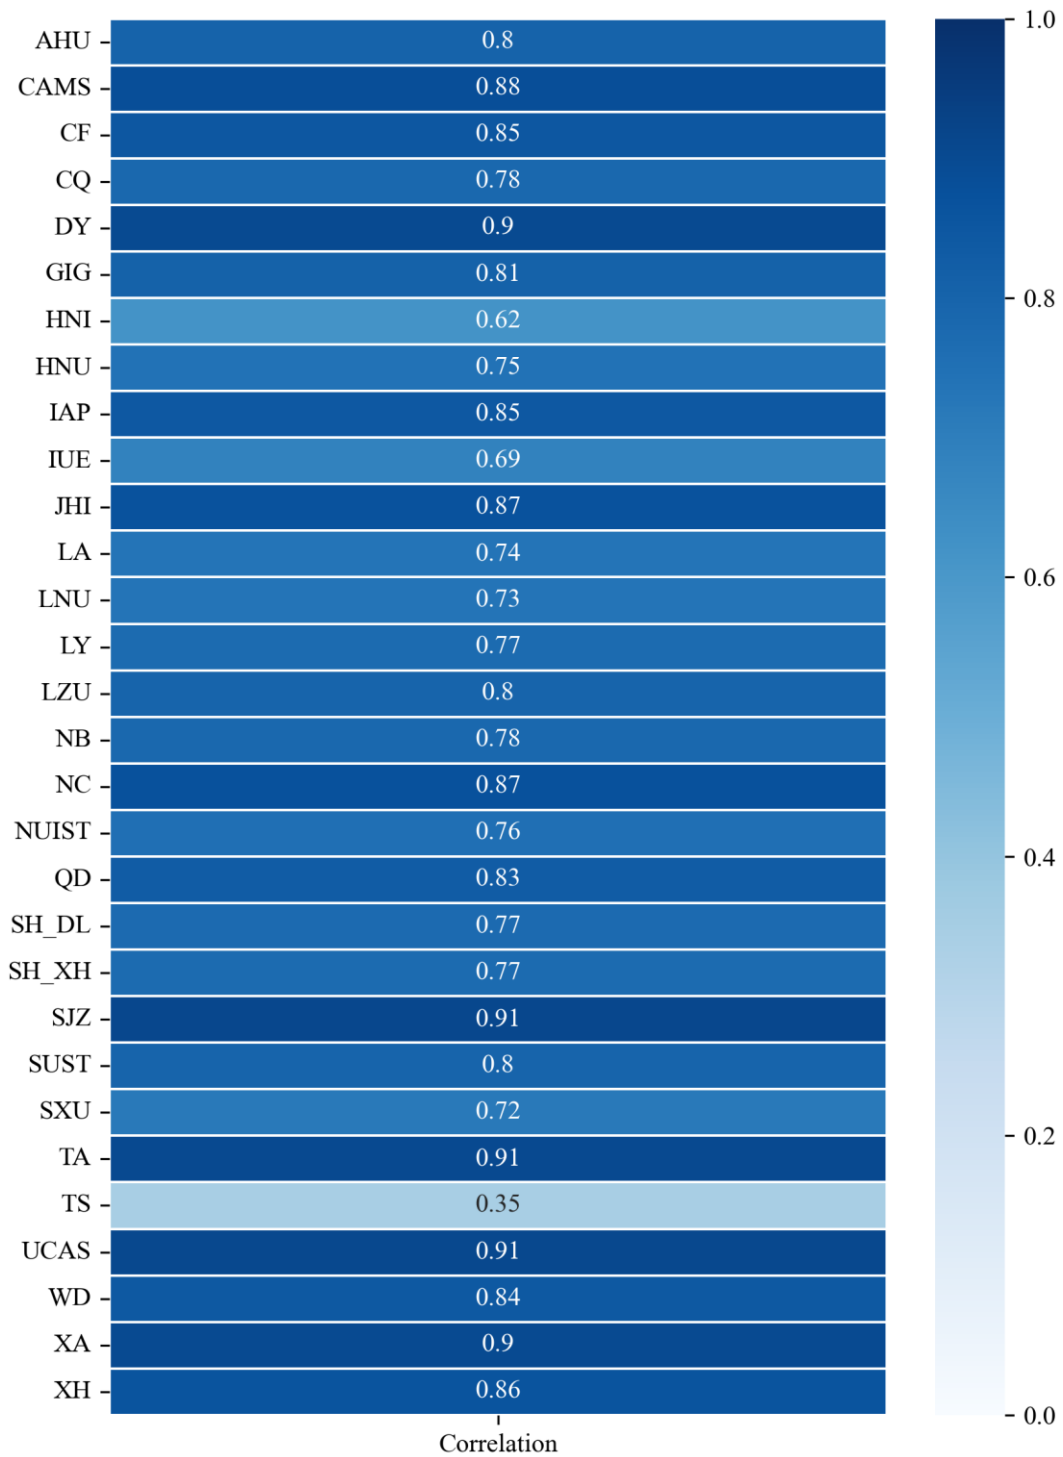

Figure S26. Correlation of NO<sub>2</sub> concentration measured by each site and CNEMC.

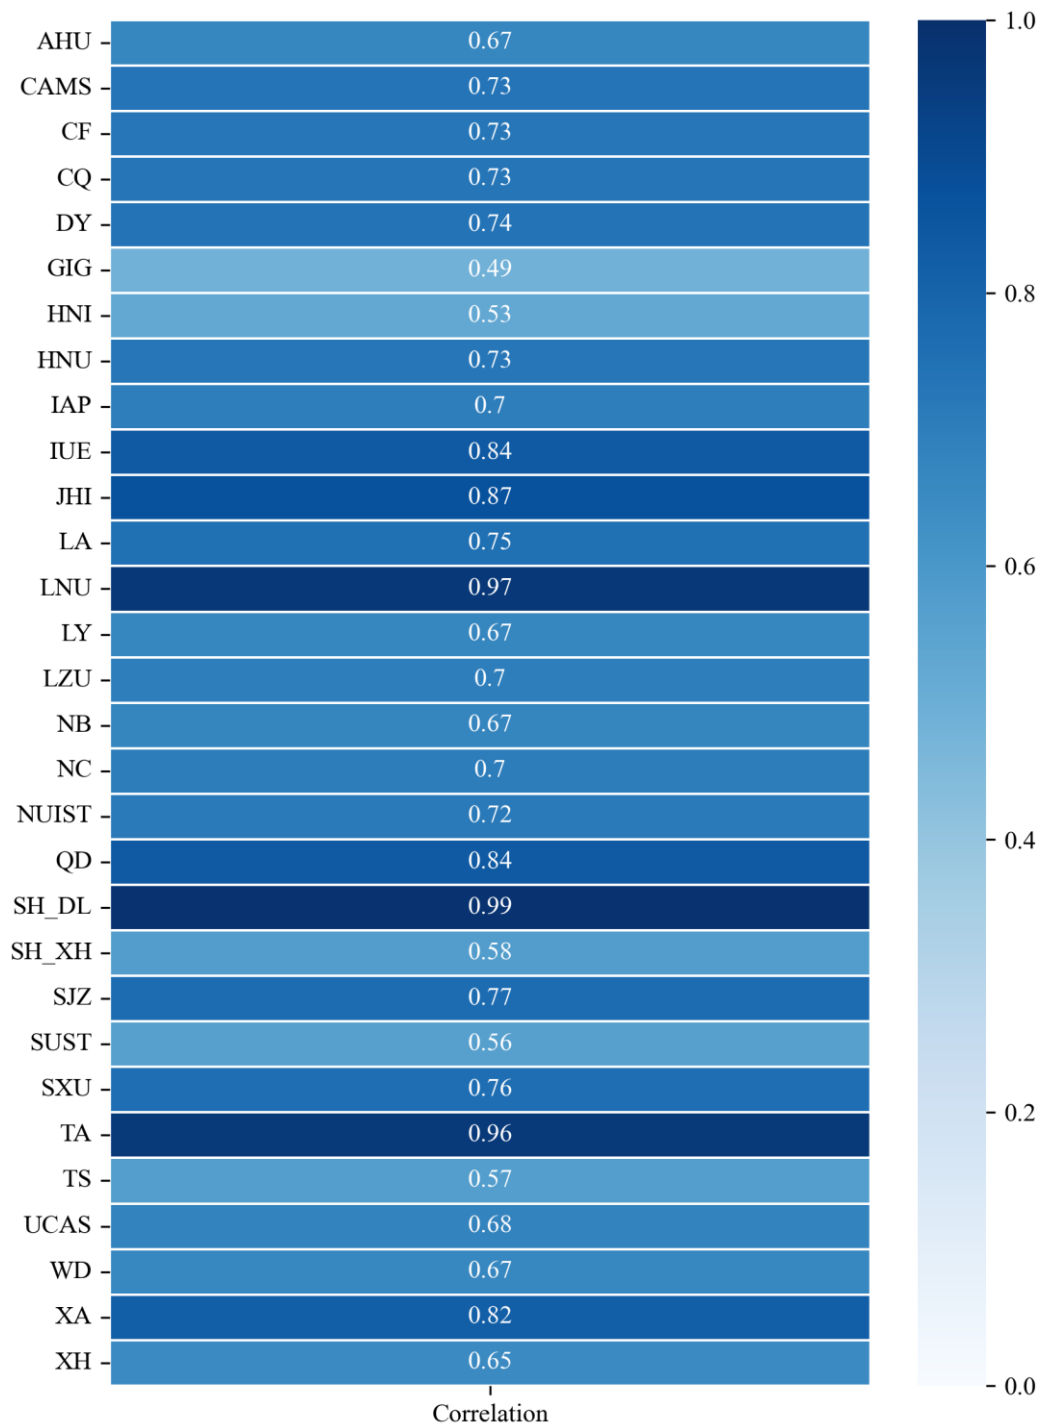

Figure S27. Correlation of tropospheric NO<sub>2</sub> VCD measured by each site and TROPOMI.

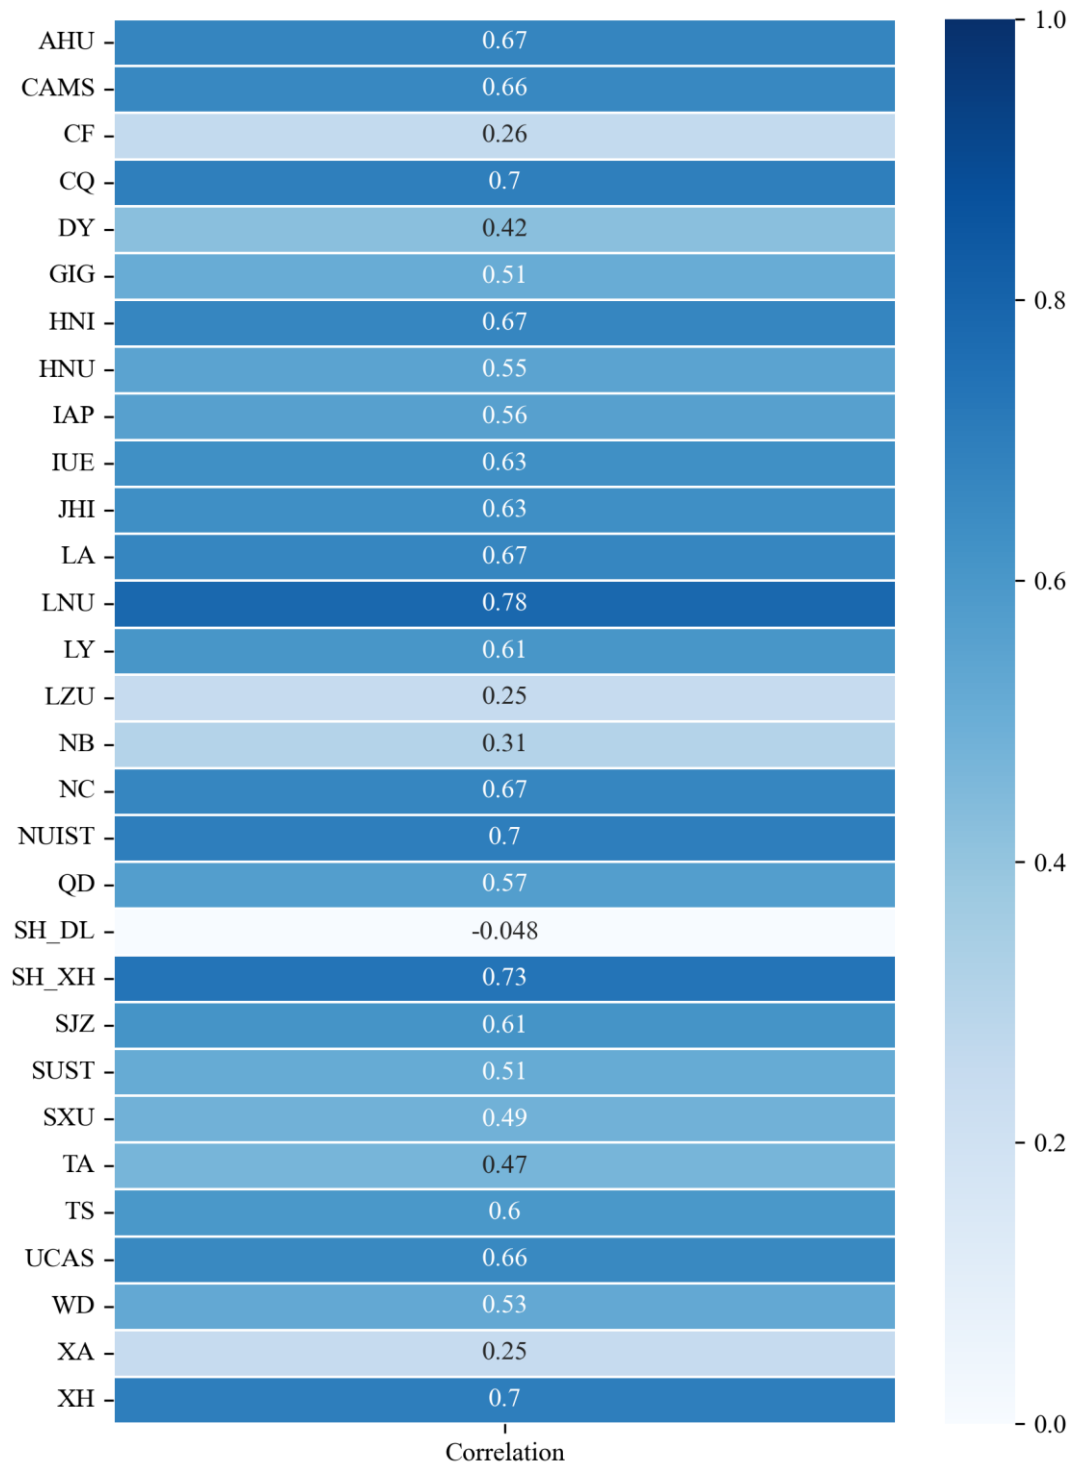

Figure S28. Correlation of tropospheric HCHO VCD measured by each site and TROPOMI
